# Supplementary material for: The value of different aspects of person-centred care: a series of discrete choice experiments in people with long-term conditions
Source: PubMed Central journal article supplement — BMJ Open. 2017 Apr 26;7(4):e015689. doi: 10.1136/bmjopen-2016-015689 (PMC5719647; doi:10.1136/bmjopen-2016-015689), 2017-04-26
Supplement: bmjopen-2016-015689.draft_revisions.pdf [file bmjopen-2016-015689.draft_revisions.pdf]

# BMJ Open

## Substance or style in person-centred care: examination of what matters most to patients

|                                 |                                                                                                                                                                                                                                                                                                                                                                                                                                          |
|---------------------------------|------------------------------------------------------------------------------------------------------------------------------------------------------------------------------------------------------------------------------------------------------------------------------------------------------------------------------------------------------------------------------------------------------------------------------------------|
| Journal:                        | <i>BMJ Open</i>                                                                                                                                                                                                                                                                                                                                                                                                                          |
| Manuscript ID                   | bmjopen-2016-015689                                                                                                                                                                                                                                                                                                                                                                                                                      |
| Article Type:                   | Research                                                                                                                                                                                                                                                                                                                                                                                                                                 |
| Date Submitted by the Author:   | 21-Dec-2016                                                                                                                                                                                                                                                                                                                                                                                                                              |
| Complete List of Authors:       | Burton, Christopher; University of Sheffield, Academic Unit of Primary Medical Care<br>Entwistle, Vikki; University of Aberdeen, HSRU<br>Elliott, Alison; University of Aberdeen, Institute of Applied Health Sciences<br>Krucien, Nicolas; Univ Aberdeen, Health Economic Research Unit<br>Porteous, Terry; University of Aberdeen, Health Services Research Unit<br>Ryan, Mandy; University of Aberdeen, Health Economic Research Unit |
| <b>Primary Subject Heading</b>: | Patient-centred medicine                                                                                                                                                                                                                                                                                                                                                                                                                 |
| Secondary Subject Heading:      | Health economics, Health services research                                                                                                                                                                                                                                                                                                                                                                                               |
| Keywords:                       | Person-centred care, self-management, discrete choice experiment, patient-centred care                                                                                                                                                                                                                                                                                                                                                   |
|                                 |                                                                                                                                                                                                                                                                                                                                                                                                                                          |

SCHOLARONE™  
Manuscripts

1  
2  
3 **Substance or style in person-centred care: examination of what matters most to patients**  
4  
5  
6  
7

8 Authors  
9

10  
11  
12 Christopher Burton, Professor of Primary Care<sup>1</sup>  
13

14 Vikki A Entwistle, Professor of Health Services Research<sup>2</sup>  
15

16 Alison M Elliott, Senior Research Fellow in Primary Care<sup>3</sup>  
17

18 Nicolas Krucien, Research Fellow in Health Economics<sup>4</sup>  
19

20 Terry Porteous, Research Fellow in Health Services Research<sup>2</sup>  
21

22 Mandy Ryan, Professor of Health Economics<sup>4</sup>  
23  
24  
25  
26

- 27  
28 1. Academic Unit of Primary Medical Care, University of Sheffield  
29 2. Health Services Research Unit, University of Aberdeen  
30  
31 3. Institute of Applied Health Sciences, University of Aberdeen  
32  
33 4. Health Economic Research Unit, University of Aberdeen  
34  
35  
36

37 Corresponding author

38 Christopher Burton

39 Academic Unit of Primary Medical Care

40 University of Sheffield

41 Samuel Fox House, Northern General Hospital

42 Sheffield S5 7AU  
43  
44

45  
46 Email [chris.burton.tuos@gmail.com](mailto:chris.burton.tuos@gmail.com)

47 Phone +44 (0)1114 222 2099  
48  
49  
50  
51  
52  
53  
54  
55  
56  
57  
58  
59  
60

1  
2  
3 ABSTRACT  
4  
5

6 Objective: To measure the value patients place on different aspects of person-centred care.  
7

8  
9 Design: We systematically identified four attributes of person-centred care. We then measured their  
10 value to 923 people with either chronic pain or chronic lung disease over three discrete choice  
11 experiments (DCEs) about services to support self-management. We calculated the value of each  
12 attribute for all respondents, and identified groups of people with similar preferences using latent  
13 class modelling.  
14  
15  
16  
17  
18  
19

20  
21 Setting: DCEs conducted online via a commercial survey company.  
22  
23

24 Participants: Adults with either chronic pain (two DCEs, N= 517 and 206 respectively) or  
25 breathlessness due to chronic respiratory disease (N=200).  
26  
27  
28

29 Results: Participants were more likely to choose services with higher level person-centred attributes.  
30 They most valued services that took account of a person's current situation (likelihood of selection  
31 increased by 16.9%; 95%CI 15.4 to 18.3) and worked with the person on what they wanted to get  
32 from life (15.8%; 14.5 to 17.1). More personally relevant information was valued less than these  
33 (12.3%; 11.0 to 13.6). A friendly and personal communicative style was valued least (3.8%; 2.7 to  
34 4.8). Latent class models indicated that a substantial minority of participants valued personally  
35 relevant information over the other attributes.  
36  
37  
38  
39  
40  
41  
42  
43  
44

45 Conclusion: This is the first study to measure the value patients place on different aspects of person-  
46 centred care. Professional training needs to emphasise the substance of clinical communication –  
47 working responsively with individuals on what matters to them – as well as the style of its delivery.  
48  
49  
50  
51  
52  
53  
54  
55  
56  
57  
58  
59  
60

## Article Summary

### Strengths and limitations of this study

- This is the first study to quantify the value which patients place on different aspects of person-centredness.
- Person-centred care is a complex concept: we designed the attributes for the discrete choice experiments using a rigorous process involving both theoretical and empirical work followed by two cycles of development and testing.
- We conducted three related discrete choice experiments to increase generalisability and to reduce the risk that the results were biased by our choice of methods or population.
- The experiments were sufficiently powered to report overall values and to identify and characterise sub-groups of patients with similar patterns of values.

## INTRODUCTION

Person-centred care is key to high quality healthcare [1]. Person- [2] (or patient-) [3] centred care is a complex concept, which one widely used definition summarises as “respectful and responsive to individual patient preferences, needs, and values, and ensuring that patient values guide all clinical decisions” [4]. It can depend on practitioners adopting an appropriate communication style, providing personally relevant information, taking account of individuals’ personal situations, and working with patients on what they want to get from life [5, 6]. Of these, communication style is the most often addressed in health professional training, although emphasis on this has been criticised [7, 8]. No studies have quantified how much these different aspects of person-centred care matter to patients.

Alongside the emphasis on person-centred care, there is a drive to support people with long-term conditions to “self-manage” [9, 10]. Recent critiques of health services’ support for self-management have suggested that it is often delivered in ways that fall short of aspirations for person-centred care [11]. First, services often rely on a “one-size-fits-all” approach, although people have diverse capabilities and needs for support [12]. Second, interventions and approaches are often influenced by professionals’ biomedical perspectives [13] rather than what people value for living well with their conditions [14]. Third, while much self-management support focuses on providing individuals with knowledge, skills and motivation, the barriers to effective self-management commonly lie in people’s broader social and material environments [15-17]. Support for self-management thus provides an important context for the study of person-centred care.

We aimed to measure what matters to patients in relation to person-centred care by conducting a series of discrete choice experiments about services to support self-management for people with long term conditions.

## METHODS

Discrete choice experiments (DCEs) enable researchers to measure individuals' preferences by calculating the value they place on particular attributes [18]. They involve participants completing a set of hypothetical choice tasks, each of which involves choosing between two or more alternatives. The alternatives are described in terms of multiple attributes, with levels which are systematically varied across the choice tasks. Participants' responses are analysed to measure the influence of the different levels of attributes on choices.

We designed and used DCEs in three linked studies, two among people with chronic pain and one among people with breathlessness due to chronic respiratory disease. Both conditions are common and directly affect individuals through current symptoms. Self-management of these conditions requires adaptation to the limitations caused by the condition [13], but does not include technical tasks such as monitoring blood tests or treatment. Each of the three DCEs used the same attribute levels and set of choice tasks, with minor contextual changes to the wording. The second chronic pain DCE was similar to the first except that we excluded any reference to the cost of a service, to avoid potential bias of results due to cost.

### Development of the DCE

DCEs typically include attributes and levels which describe the process of care, and are easily defined (e.g. consulting a doctor versus seeing a nurse) or easily quantified (e.g. waiting for different lengths of times). In this study we sought to value attributes which describe the nature of care – its person-centredness - which is less easily defined in single statements or which may be interpreted in different ways [19]. To address this challenge and ensure that the DCE was valid and reliable, we followed best practice to design, develop and test the DCE through three stages: attribute selection; attribute testing and development; and pilot survey. To do this, we drew on recent theoretical [12] and empirical research [5], and conducted focus group discussions and think-aloud interviews [20] in

1  
2  
3 which participants talked through their responses to draft versions of the DCE. We designed the DCE  
4  
5 to provide maximal statistical efficiency for a manageable length of questionnaire by applying D-  
6  
7 Efficient design with a Bayesian approach [21]. This involved conducting a preliminary DCE with 117  
8  
9 participants in order to develop a “well-informed” experimental design for the main study.  
10

### 11 12 *Attribute selection*

13  
14 We began the process of attribute selection from three starting points. First was the idea that the  
15  
16 overall aim of support for self-management is to enable people “to live well with long-term  
17  
18 conditions” [12]. Second, we used the notion that person-centredness is primarily a matter of  
19  
20 treating everyone “as a person” [2]. Treating someone as a person includes recognising and  
21  
22 responding to their individual characteristics and preferences. It also includes respecting them as a  
23  
24 fellow human, recognition of their unique biography and identity, and support for their autonomy to  
25  
26 shape and live their lives according to their own values rather than those of others. Third, we used a  
27  
28 conceptual map of what matters to patients about how healthcare is delivered [5] which considers  
29  
30 items in three categories: “*what health services are like and do*”, “*how they relate to me*” and “*what*  
31  
32 *they enable me to do*”.  
33  
34  
35

36  
37 We explored these, and other, ideas around person-centredness in relation to support for self-  
38  
39 management in six focus groups, each comprising between 5 and 7 individuals. Three groups  
40  
41 involved people with chronic pain (members of two peer support groups and individuals recruited  
42  
43 through a pain clinic), two groups involved non-clinical providers of support for self-management of  
44  
45 long-term conditions, and one group came from a multidisciplinary pain team. Groups lasted  
46  
47 between 40 and 65 minutes and began by open discussion, following a topic guide, about ways in  
48  
49 which support for self-management may be made personal. Later in the groups, we presented 6  
50  
51 provisional attributes of person-centredness, each with 2 or 3 levels, for discussion. Focus groups  
52  
53 were audio-recorded, transcribed and analysed thematically. In conducting and analysing the focus  
54  
55 groups we did not aim for exhaustive recruitment, or in-depth qualitative analysis. Rather the focus  
56  
57  
58  
59  
60

1  
2  
3 groups were used as sources of contextual and confirmatory (or disconfirming) data, to be used -  
4  
5 alongside our own and others' conceptual work and empirical evidence – in developing the  
6  
7 attributes and levels of the DCE.  
8  
9

10 In the attribute selection phase we recognised that the data from these different sources overlapped  
11  
12 in various ways. For the DCE design, however, we needed a manageable number of well  
13  
14 differentiated (ideally potentially independent) attributes. We chose to focus on four aspects of  
15  
16 person-centredness, summarised as information, situation, living well and communicative style. A  
17  
18 simplified view of the relationship between these aspects and the developmental sources is shown  
19  
20 in Figure 1.  
21  
22

### 23 24 *Attribute development and testing*

25  
26 We carried out two cycles of development and testing of attributes and their associated levels. Each  
27  
28 cycle comprised three stages: drafting of attribute-level statements, cognitive testing of these  
29  
30 statements using think-aloud interviews [20], and evaluation of the think-aloud results. Statements  
31  
32 were drafted and revised by all members of the research team in order that they would be broadly  
33  
34 applicable and easily and consistently understood. We conducted think-aloud interviews with a total  
35  
36 of 17 people with chronic pain, 6 of whom had participated in the focus groups; ten took part in the  
37  
38 first cycle and seven in the second. During the think-aloud interviews, participants completed a  
39  
40 paper-based version of the DCE using the current attributes and were asked to describe their  
41  
42 thoughts about the attributes and levels, and their decisions, as they did so. Think-aloud interviews  
43  
44 were audio-recorded, transcribed and analysed to identify areas for clarification. Evaluation at the  
45  
46 end of the first cycle led to revision of attribute-level statements to be used in the second cycle. In  
47  
48 particular, we found that respondents experienced problems when three levels were assigned to  
49  
50 each attribute. If these were neutral, high and very high, some people found the very high level  
51  
52 excessive, and there was some variation in how people interpreted which of the two higher levels  
53  
54 was better. However if the levels were low (i.e. actively not person-centred) neutral and high, people  
55  
56  
57  
58  
59  
60



1  
2  
3 made choices to avoid the low rather than choose between the two higher attributes. As we were  
4  
5 interested in how people positively valued more person-centred care, rather than their negative  
6  
7 valuing of impersonal care, we limited the levels for each attribute to two, designed to represent:  
8  
9 neutral and high person-centredness.  
10

### 11 12 *Final attribute wording*

13  
14 The four final person-centredness attributes and their levels are listed in box 1. The attributes were  
15  
16 presented in relation to services to support self-management for chronic pain (DCEs 1 & 3) and  
17  
18 chronic lung disease (DCE 2). In addition to the four person-centredness attributes, we also included  
19  
20 a cost attribute in DCEs 1 and 2, presented as the cost per week for a 6-week programme. This had  
21  
22 four levels ranging from £5 to £20 per week. We included the cost attribute in order to be able to  
23  
24 estimate willingness to pay, a monetary measure of benefit . To address a concern that the inclusion  
25  
26 of cost might bias the results (in the UK the NHS does not charge patients for treatment at the point  
27  
28 of consumption) we modified the design in our third DCE to exclude the cost attribute; this allowed  
29  
30 us to compare responses with and without a cost attribute.  
31  
32  
33  
34

### 35 **Content of the DCEs**

36  
37 The DCEs included 12 choice tasks per participant. Each choice task involved choosing between three  
38  
39 service specifications with different attribute-level sets. The attributes and their levels are  
40  
41 summarised in box 1 and an example of one choice task is displayed in Supplementary Figure 1.  
42  
43 Participants first selected their least preferred option and then selected their most preferred option  
44  
45 - a best-worst scaling type 3 approach [22]. The questionnaire also included questions about age,  
46  
47 gender, domestic status, education, household income and self-rated overall health. Severity of  
48  
49 chronic pain was assessed using the Chronic Pain Grade [23] and severity of chronic lung disease was  
50  
51 assessed using the Clinical COPD Questionnaire [24].  
52  
53  
54  
55  
56  
57  
58  
59  
60

## Participants and delivery of the DCEs

The DCEs and accompanying questions were delivered online through the research company ResearchNow™. Participants were UK-based members of the company's online panel who were aged 16 or over, who had one or more self-reported conditions associated with chronic pain (e.g. osteoarthritis, fibromyalgia) or breathlessness (e.g. asthma, COPD), and whose response to screening questions indicated current pain or breathlessness. For chronic pain the screening required affirmative responses to two questions based on an international definition of chronic pain [25]: "Are you currently troubled by pain or discomfort, either all the time or on and off?" and "Have you had this pain or discomfort for more than three months?". For breathlessness we required a score of 2 or more using the Royal College of Physicians 3-item questionnaire for asthma [26] which indicates respiratory symptoms most days with an impact on either activity or sleep. Each DCE was made available by the research company until the target number of eligible participants had completed it. The DCEs were conducted between May and August 2015.

## Tests of data quality

We analysed the risk of individuals submitting low quality data in three ways, serial non-participation, dominance and response time; these are detailed in the Supplementary Methods. The primary analysis for each of the three DCEs included data from all participants, however we also conducted a sensitivity analysis in which participants who failed two or more data quality tests were excluded.

## Data analysis

### *Value of person-centredness attributes*

We estimated the effects of higher person-centredness of each attribute on participants' choices using logistic regression with a multinomial logit (MNL) model. For each attribute, we reported the direct choice elasticity (the absolute change in the probability of a service being chosen when the

1  
2  
3 attribute was switched from a “neutral” to “high” level of person-centredness). The analysis was  
4  
5 conducted separately for each DCE.  
6  
7

### 8 *Patterns of similar value of person-centredness attributes*

9  
10 We explored patterns of preference using a latent class MNL model (LC-MNL) [27] to produce a set  
11  
12 of classes, each representing one pattern of valuation of the different attributes. We estimated six  
13  
14 LC-MNL models including between two and eight classes and retained the model with the lowest  
15  
16 Bayesian information criterion (BIC). We then sorted individuals into the different classes and  
17  
18 examined associations between latent class membership and individuals’ data quality and personal  
19  
20 characteristics (e.g. gender, education level, etc.). For this analysis, we combined data from the first  
21  
22 chronic pain DCE (including the cost attribute) and the breathlessness DCE.  
23  
24

### 25 *Sample size*

26  
27 We set target sample sizes for the three DCEs of 500, 200 and 200 participants respectively. These  
28  
29 had more than adequate power to investigate average preferences [28] but were inflated to permit  
30  
31 the latent class modelling. The design of the DCE was carried out with Ngene 1.1.1 and the analysis  
32  
33 was conducted with R 3.2.3.  
34  
35  
36  
37

### 38 **Patient involvement**

39  
40 Representatives from two patient groups were members of the study management group (although  
41  
42 only one was able to participate actively throughout). The development of the study was informed  
43  
44 by prior and contemporaneous research exploring patients’ views on what constituted person-  
45  
46 centred care. We used the focus group and think-aloud stages to ensure that the content of the  
47  
48 DCEs addressed key issues for patients in a comprehensible way. Two patient groups assisted with  
49  
50 recruitment to the focus group and think-aloud stages.  
51  
52  
53  
54  
55  
56  
57  
58  
59  
60

## Ethics

The study was approved by the North of Scotland Research Ethics Service (reference 14/NS/0075).

Participants in the developmental stages all provided informed consent to take part. Consent for participants in the DCEs was managed by ResearchNow.

## RESULTS

### Participant characteristics

517 individuals completed the main chronic pain DCE (DCE1); 200 individuals completed the breathlessness DCE (DCE2) and 206 completed the chronic pain (no-cost) DCE (DCE3). Their key characteristics are listed in table 1 and in Supplementary Table S1. Across the three DCEs, between 10 and 20% of participants had experience of self-management support through a professional programme (e.g. pain management or pulmonary rehabilitation) or a peer support group.

### DCE data quality

Results for the individual tests for risk of low data quality are shown in Table 2. Overall data quality was good: 714 participants failed no tests (77.4%), 160 failed one (17.3%), 37 failed two (4.0%) and 12 (1.3%) failed all three. There was no difference in data quality between studies (chi-square = 9.34,  $p = 0.15$ ). The most common indicator of potentially low data quality was (short) response time.

### Value of person-centredness attributes

In each DCE, there was a clear and consistent difference between attributes in their estimated values. Table 3 shows the results for each of the DCEs: the attributes for which a higher level of person-centredness was most valued were situation (taking account of a person's current situation) and living well (working with them on what they wanted to get from life). More personally relevant information (contrasted with the same information for everyone) was valued less than these and a friendly and personal communicative style (contrasted with a neutral professional style) was valued least. Overall, higher person-centredness of the situation and living well attributes were valued four

1  
2  
3 times more than higher person-centredness of communicative style. The similarity of findings  
4  
5 between the two DCEs with a cost attribute in different conditions suggests the findings are not  
6  
7 condition-specific, and the similarity between these two and the second pain DCE suggests that  
8  
9 asking people about paying for services did not substantially affect preferences. The sensitivity  
10  
11 analysis reported in Supplementary Table S2 shows that excluding those participants who failed at  
12  
13 least two of the data quality tests had minimal effects on the results.  
14  
15

### 16 17 **Patterns of similar value of person-centredness attributes**

18  
19 The latent class analysis included 717 participants. The optimal model had 4 classes. The results are  
20  
21 shown in table 4; the upper part shows the regression coefficients for the five attributes of each  
22  
23 class, and the lower part the association of each class with demographic, economic and data quality  
24  
25 variables. Based on the features of individuals allocated probabilistically to the four classes we  
26  
27 characterised them as follows: Class 1 - "Situation / living well dominant": this was the largest group  
28  
29 (N=286, 39.9%) and had a similar pattern of coefficients to the aggregate study population. Class 2 -  
30  
31 "Information dominant": this group (N=137, 19.1%) valued personalised information more highly  
32  
33 than other characteristics. Class 3 - "Cost minimisers": this group (N=126, 17.6%) showed the  
34  
35 strongest aversion to cost with weak preferences for person-centredness of the attributes. More  
36  
37 than a third of this group were fast responders to items suggesting that rather than weighing up  
38  
39 choices, they made choices heuristically, driven by cost; members of this group were more likely  
40  
41 than the other groups to have a low income (<£15,600 pa). Although the coefficients for the person-  
42  
43 centredness attributes were smaller in this class compared to classes 1 and 2, they were still  
44  
45 significantly positive and followed a similar pattern to the overall sample results. Class 4 -  
46  
47 "Inconsistent data": this group (N=168, 23.4%) showed no strong preference for person-centredness  
48  
49 in the attributes and had a weakly positive coefficient for cost which was unexpected as it implies a  
50  
51 willingness to pay more for less valued attributes. Members of this group were much more likely to  
52  
53 fail tests of data quality than those in other groups, suggesting that these results may represent  
54  
55  
56  
57  
58  
59  
60

1  
2  
3 failure to comprehend tasks (the dominance test) or quickly “clicking through” answers without  
4  
5 considering them (the response time test).  
6  
7

## 8 **DISCUSSION**

9  
10 Patients valued two aspects of person-centredness more highly than others. These were attention to  
11  
12 their personal situation and orientation to what matters to them for living well. A substantial  
13  
14 minority valued personal relevance of information provision most highly. A more friendly and  
15  
16 personal communicative style was consistently valued least.  
17

18  
19 This is the first study, to our knowledge, to use discrete choice experiments in health services  
20  
21 research to examine such highly personal attributes of health care delivery. DCEs, which are widely  
22  
23 used in economics, represent the most appropriate method to answer our research question.  
24

25  
26 Neither simpler questionnaire surveys nor qualitative research, despite its invaluable depth and  
27  
28 theoretical rigour, can quantify values for preferences. Observational studies of practice would be  
29  
30 vulnerable to multiple confounders and outcomes may be only weakly connected to processes [29].  
31

32  
33 The attributes were developed from prior theoretical and empirical work and refined and tested  
34  
35 through a series of stages following best practices for DCE development. By using an online panel we  
36  
37 obtained large samples: in the case of the chronic pain DCEs, participants had similar characteristics  
38  
39 to an earlier population cohort study [30]. We conducted three separate DCEs with overlapping  
40  
41 designs to establish generalisability beyond a single condition and to ensure that the findings were  
42  
43 not an artefact of including a cost attribute. The large sample size and use of best-worst scaling  
44  
45 allowed us to conduct latent class analysis and define four categories, with two in particular  
46  
47 demonstrating contrasting but highly plausible preference types.  
48

49  
50 Although robustly derived and tested, the four attributes, even at the higher levels of person-  
51  
52 centredness, do not add up to a complete account of person-centred care [1-5]. It is possible that  
53  
54 the wording of attribute descriptions may have biased the results by creating a larger “gap” between  
55  
56 the neutral and higher levels of person-centredness for some attributes than others. We attempted  
57  
58 the neutral and higher levels of person-centredness for some attributes than others. We attempted  
59  
60

1  
2  
3 to minimise this by careful testing of the wording in the development stages and by only offering  
4  
5 choices between neutral and higher levels so as to avoid negative values for particularly poor forms  
6  
7 of practice (values for avoiding loss are typically weighted differently from values for potential gains  
8  
9 [31]). We acknowledged the possibility that the data would contain systematic error introduced by  
10  
11 the challenge of completing the DCE. Rather than simply eliminate data of low quality (and  
12  
13 potentially introduce bias due to the choice of quality criteria), we chose first to include all data in  
14  
15 the primary analysis, secondly to conduct a sensitivity analysis in which data with high risk of low  
16  
17 quality were excluded, and thirdly to conduct the latent class analysis which identified a group of  
18  
19 patents with inconsistent and weak preferences which included many of the individuals who met  
20  
21 criteria for low data quality.  
22  
23

24  
25 Making support for self-management more person-centred involves working on a complex cluster of  
26  
27 attitudes and practices. This study shows that people place a high value on support that pays  
28  
29 attention to their particular situation and on the orientation of support to what matters to them for  
30  
31 living well with their condition. We also found that people vary in the value they place on different  
32  
33 aspects of person-centredness and for a substantial minority the provision of personally relevant  
34  
35 information was the most valued attribute. One striking finding was that the least valued aspect of  
36  
37 person-centredness was that of adopting a “friendly and personal” communicative tone compared  
38  
39 to a more neutral professional one. This is important, given the current/conventional emphasis on  
40  
41 communication skills training for professionals, which has only infrequently been challenged [7, 32].  
42  
43 Our findings lend support to the view that person-centred communication needs to be underpinned  
44  
45 by a broad sense of purpose that orients its content to enable the person to act in their situation and  
46  
47 towards what matters to them in life. Without that kind of purpose, attention to the style of  
48  
49 communication is unlikely to achieve the responsiveness or scope for patient engagement that is  
50  
51 sought. While our study was limited to support for self-management, the findings are likely to be  
52  
53 more widely generalisable; recent work in acute settings has shown that patients rate  
54  
55  
56  
57  
58  
59  
60

1  
2  
3 communication which focuses on purpose, even when it has little or no emotional engagement, as  
4  
5 excellent [8].  
6  
7

8 In the introduction we described person-centred care as a complex concept with multiple aspects.  
9  
10 Our findings of heterogeneity in the valuation of four of these aspects (our attributes) make it clear  
11  
12 that individuals vary in which features of person-centred care matter to them most. One size does  
13  
14 not fit all and providers need to be conscious of this. An emphasis on “treating as a person” –  
15  
16 recognising and cultivating an individual’s “person-al” capabilities [2] - leads to some challenging  
17  
18 issues. It is not clear how this can be achieved, and it is quite possible that individuals and their  
19  
20 healthcare providers have conflicting priorities and values. Despite these challenges, the values  
21  
22 which patients place on these attributes emphasises the importance for healthcare of providing  
23  
24 person -centred (or “person-supportive”) [2] care.  
25  
26  
27

## 28 **CONCLUSION**

29  
30 The aspects of person-centred support for self-management that people with long-term conditions  
31  
32 most value are attention to their personal situation and an orientation to what matters to them in  
33  
34 life. Investment in training to improve professionals’ skills must address the substance of clinical  
35  
36 communication – working responsively with individuals on what matters to them – as well as its  
37  
38 style.  
39  
40  
41  
42  
43  
44  
45  
46  
47  
48  
49  
50  
51  
52  
53  
54  
55  
56  
57  
58  
59  
60



### *Funding & Sponsorship*

The study was funded by the Health Foundation (reference THF 7264) and sponsored by the University of Aberdeen. Neither funder nor sponsor had any involvement in the conduct or reporting of the study.

### *Acknowledgements*

We wish to thank the members of Aberdeen & District Fibromyalgia support group and Grampian Pain Support for encouraging participation in the study and particularly to two of their members who took active roles as members of the study management committee.

### *Conflict of Interest*

All authors have completed the ICMJE uniform disclosure form at [www.icmje.org/coi\\_disclosure.pdf](http://www.icmje.org/coi_disclosure.pdf) and declare: no support from any organisation for the submitted work; no financial relationships with any organisations that might have an interest in the submitted work in the previous three years; no other relationships or activities that could appear to have influenced the submitted work.

### *Contributorship*

The study was conceived by CB, MR, AE and VE. All authors were involved in the planning, design, conduct and reporting of the study. TP conducted the focus groups and think-aloud studies and carried out the initial analysis of these. CB and VE led the wording of attributes and NK conducted the analysis of DCE results. All authors contributed to the writing and revision of the manuscript. CB is guarantor for the study.

### Data sharing statement

We will review any application to share the data on a case by case basis.

1  
2  
3  
4  
5  
6 Transparency  
7  
8

9 The lead author (CB) affirms that the manuscript is an honest, accurate, and transparent account of  
10 the study being reported; that no important aspects of the study have been omitted; and that any  
11 discrepancies from the study as planned have been explained.  
12  
13  
14  
15  
16  
17  
18  
19

20 Copyright  
21  
22

23 The Corresponding Author has the right to grant on behalf of all authors and does grant on behalf of  
24 all authors, a worldwide licence to the Publishers and its licensees in perpetuity, in all forms, formats  
25 and media (whether known now or created in the future), to i) publish, reproduce, distribute, display  
26 and store the Contribution, ii) translate the Contribution into other languages, create adaptations,  
27 reprints, include within collections and create summaries, extracts and/or, abstracts of the  
28 Contribution, iii) create any other derivative work(s) based on the Contribution, iv) to exploit all  
29 subsidiary rights in the Contribution, v) the inclusion of electronic links from the Contribution to  
30 third party material where-ever it may be located; and, vi) licence any third party to do any or all of  
31 the above.  
32  
33  
34  
35  
36  
37  
38  
39  
40  
41  
42  
43  
44  
45  
46  
47  
48  
49  
50  
51  
52  
53  
54  
55  
56  
57  
58  
59  
60

## References:

- 1 Epstein RM, Fiscella K, Lesser CS, et al. Why The Nation Needs A Policy Push On Patient-Centered Health Care. *Health Affairs* 2010;29:1489-95 doi:10.1377/hlthaff.2009.0888.
- 2 Entwistle VA, Watt IS. Treating patients as persons: a capabilities approach to support delivery of person-centered care. *Am J Bioeth* 2013;13:29-39 doi:10.1080/15265161.2013.802060; 10.1080/15265161.2013.802060.
- 3 Berwick DM. What 'patient-centered' should mean: confessions of an extremist. *Health Aff (Millwood)* 2009;28:w555-65 doi:10.1377/hlthaff.28.4.w555 [doi].
- 4 Institute of Medicine. Priority areas for national action: Transforming health care quality 2003.
- 5 Entwistle V, Firmigl D, Ryan M, et al. Which experiences of health care delivery matter to service users and why? A critical interpretive synthesis and conceptual map. *J Health Serv Res Policy* 2012;17:70-8 doi:10.1258/jhsrp.2011.011029; 10.1258/jhsrp.2011.011029.
- 6 Ryan M, Kinghorn P, Entwistle VA, et al. Valuing patients' experiences of healthcare processes: towards broader applications of existing methods. *Soc Sci Med* 2014;106:194-203 doi:10.1016/j.socscimed.2014.01.013 [doi].
- 7 Wright EB, Holcombe C, Salmon P. Doctors' communication of trust, care, and respect in breast cancer: qualitative study. *BMJ* 2004;328:864 doi:10.1136/bmj.38046.771308.7C [doi].
- 8 Young B, Hill J, Gravenhorst K, et al. Is communication guidance mistaken? Qualitative study of parent-oncologist communication in childhood cancer. *Br J Cancer* 2013;109:836-43 doi:10.1038/bjc.2013.413 [doi].
- 9 Lorig KR, Holman H. Self-management education: history, definition, outcomes, and mechanisms. *Ann Behav Med* 2003;26:1-7.
- 10 Townsend A, Wyke S, Hunt K. Self-managing and managing self: practical and moral dilemmas in accounts of living with chronic illness. *Chronic Illness* 2006;2:185-94.
- 11 Kendall E, Rogers A. Extinguishing the social?: state sponsored self-care policy and the Chronic Disease Self-management Programme. *Disability & Society* 2007;22:129-43.
- 12 Entwistle VA, Cribb A. Enabling people to live well 2013.
- 13 Taylor S, Pinnock H, Epiphanou E, et al. A rapid synthesis of the evidence on interventions supporting self-management for people with long-term conditions: PRISMS - Practical systematic Review of Self-Management Support for long-term conditions. *Health Serv Deliv Res* 2014;2 doi:10.3310/hsdr02530.
- 14 Morgan HM, Entwistle VA, Cribb A, et al. We need to talk about purpose: a critical interpretive synthesis of health and social care professionals' approaches to self-management

1  
2  
3 support for people with long-term conditions. *Health Expect* 2016 doi:10.1111/hex.12453  
4 [doi].

5  
6 15 Dowrick C, Kokanovic R, Hegarty K, et al. Resilience and depression: perspectives from  
7 primary care. *Health (London)* 2008;12:439-52 doi:10.1177/1363459308094419;  
8 10.1177/1363459308094419.

9  
10 16 Hinder S, Greenhalgh T. "This does my head in". Ethnographic study of self-management  
11 by people with diabetes. *BMC Health Serv Res* 2012;12:83,6963-12-83 doi:10.1186/1472-  
12 6963-12-83; 10.1186/1472-6963-12-83.

13  
14 17 Sinding C, Miller P, Hudak P, et al. Of time and troubles: patient involvement and the  
15 production of health care disparities. *Health (London)* 2012;16:400-17  
16 doi:10.1177/1363459311416833 [doi].

17  
18 18 Clark MD, Determann D, Petrou S, et al. Discrete choice experiments in health  
19 economics: a review of the literature. *Pharmacoeconomics* 2014;32:883-902  
20 doi:10.1007/s40273-014-0170-x [doi].

21  
22 19 Epstein RM, Franks P, Fiscella K, et al. Measuring patient-centered communication in  
23 patient-physician consultations: theoretical and practical issues. *Soc Sci Med* 2005;61:1516-  
24 28 doi:S0277-9536(05)00083-3 [pii].

25  
26 20 Ryan M, Watson V, Entwistle V. Rationalising the 'irrational': a think aloud study of  
27 discrete choice experiment responses. *Health Econ* 2009;18:321-36 doi:10.1002/hec.1369;  
28 10.1002/hec.1369.

29  
30 21 Ferrini S, Scarpa R. Designs with a priori information for nonmarket valuation with choice  
31 experiments: A Monte Carlo study. *J Environ Econ Manage* 2007;53:342-63  
32 doi:10.1016/j.jeem.2006.10.007.

33  
34 22 Lancsar E, Louviere J, Donaldson C, et al. Best worst discrete choice experiments in  
35 health: Methods and an application. *Soc Sci Med* 2013;76:74-82.

36  
37 23 Von Korff M, Ormel J, Keefe FJ, et al. Grading the severity of chronic pain. *Pain*  
38 1992;50:133-49.

39  
40 24 van dM, Willemse BWM, Schokker S, et al. Development, validity and responsiveness of  
41 the Clinical COPD Questionnaire. *Health and Quality of Life Outcomes* 2003;1:13-  
42 doi:10.1186/1477-7525-1-13.

43  
44 25 International Association for the Study of Pain. Classification of chronic pain. . *Pain*  
45 1986;Supplement 3 (1986) S1-S226.

46  
47 27 Greene WH, Hensher DA. A latent class model for discrete choice analysis: contrasts with  
48 mixed logit. *Transportation Research Part B: Methodological* 2003;37:681-98  
49 doi:http://dx.doi.org/10.1016/S0191-2615(02)00046-2.

1  
2  
3 28 de Bekker-Grob EW, Donkers B, Jonker MF, et al. Sample Size Requirements for  
4 Discrete-Choice Experiments in Healthcare: a Practical Guide. *The Patient - Patient-*  
5 *Centered Outcomes Research* 2015;8:373-84 doi:10.1007/s40271-015-0118-z.  
6

7  
8 29 Lilford RJ, Brown CA, Nicholl J. Use of process measures to monitor the quality of  
9 clinical practice. *BMJ* 2007;335:648-50 doi:335/7621/648 [pii].  
10

11 31 Kahneman D, Tversky A. Prospect theory: An analysis of decision under risk.  
12 *Econometrica: Journal of the Econometric Society* 1979:263-91.  
13

14 32 Salmon P, Young B. The validity of education and guidance for clinical communication in  
15 cancer care: evidence-based practice will depend on practice-based evidence. *Patient Educ*  
16 *Couns* 2013;90:193-9 doi:10.1016/j.pec.2012.04.010 [doi].  
17  
18  
19  
20  
21  
22  
23  
24  
25  
26  
27  
28  
29  
30  
31  
32  
33  
34  
35  
36  
37  
38  
39  
40  
41  
42  
43  
44  
45  
46  
47  
48  
49  
50  
51  
52  
53  
54  
55  
56  
57  
58  
59  
60

**Box 1. Attributes and levels for the discrete choice experiments.**

| ATTRIBUTE LABEL | ATTRIBUTE DESCRIPTION                                                                                                                                                                                                    | ATTRIBUTE LEVELS                                                                                                                  |
|-----------------|--------------------------------------------------------------------------------------------------------------------------------------------------------------------------------------------------------------------------|-----------------------------------------------------------------------------------------------------------------------------------|
| Information     | By “information” we mean information about pain <sup>1</sup> , the conditions that cause it, and the different ways there are of managing it.                                                                            | Provides everyone with the same information (NEUTRAL)<br>Provides information that is relevant to you (HIGH)                      |
| Situation       | By “current situation” we mean things like where you live, who you live with, what resources you have, what you usually do for yourself and others, and how pain <sup>1</sup> currently affects that.                    | Takes little account of your current situation (NEUTRAL)<br>Makes suggestions that fit your current situation (HIGH)              |
| Living well     | By “what you want to get from life” we mean the things that really matter to you, especially the kinds of things that you would like to achieve or to spend more time doing, and the kind of person that you want to be. | Seems to think that everyone wants to get the same from life (NEUTRAL)<br>Works with you on what you want to get from life (HIGH) |
| Communication   | By “communication” we mean the way that the support service might communicate with you                                                                                                                                   | Communicates with you in a neutral professional way (NEUTRAL)<br>Communicates with you in a friendly and personal way (HIGH)      |
| Cost            | Please assume that each support service will be provided once a week for six weeks                                                                                                                                       | Costs £5 per week<br>Costs £10 per week<br>Costs £15 per week<br>Costs £20 per week                                               |

---

<sup>1</sup> Or breathlessness, depending on sample

Table 1 Participant characteristics

| Discrete choice experiment      |                            | Chronic Pain (DCE1)<br>N=517 |    | Breathlessness (DCE2)<br>N=200 |     | Chronic Pain (DCE3)<br>N=206 |    |
|---------------------------------|----------------------------|------------------------------|----|--------------------------------|-----|------------------------------|----|
|                                 |                            |                              | %  |                                | %   |                              | %  |
| <b>Gender</b>                   | Male                       | 176                          | 34 | 86                             | 43  | 99                           | 48 |
|                                 | Female                     | 341                          | 66 | 114                            | 57  | 107                          | 52 |
| <b>Age</b>                      | < 40 years                 | 61                           | 12 | 42                             | 21  | 23                           | 11 |
|                                 | 40-49 years                | 92                           | 18 | 43                             | 22  | 31                           | 15 |
|                                 | 50-59 years                | 129                          | 25 | 48                             | 24  | 62                           | 30 |
|                                 | 60-69 years                | 157                          | 30 | 43                             | 22  | 79                           | 38 |
|                                 | ≥ 70 years                 | 78                           | 15 | 24                             | 12  | 16                           | 8  |
| <b>Marital status</b>           | Single                     | 86                           | 17 | 25                             | 13  | 30                           | 15 |
|                                 | Married/ legal partnership | 333                          | 64 | 137                            | 69  | 142                          | 69 |
|                                 | Separated/Widowed          | 98                           | 19 | 38                             | 19  | 34                           | 17 |
| <b>Education</b>                | No formal qualifications   | 32                           | 6  | 15                             | 8   | 12                           | 6  |
|                                 | Secondary/high school      | 243                          | 47 | 87                             | 44  | 90                           | 45 |
|                                 | University/College degree  | 220                          | 43 | 89                             | 45  | 91                           | 46 |
|                                 | Other                      | 22                           | 4  | 9                              | 4.5 | 13                           | 7  |
| <b>Household income</b>         | ≤£10,399/year              | 64                           | 12 | 21                             | 11  | 26                           | 13 |
|                                 | £10,400-20,799/year        | 140                          | 27 | 36                             | 18  | 46                           | 22 |
|                                 | £20,800-36,399/year        | 158                          | 31 | 33                             | 17  | 63                           | 31 |
|                                 | £36,400-51,999/year        | 61                           | 12 | 62                             | 31  | 30                           | 15 |
|                                 | ≥£1000/week (≥£52000)      | 40                           | 8  | 32                             | 16  | 21                           | 10 |
|                                 | Prefer not to say          | 54                           | 10 | 16                             | 8   | 20                           | 10 |
| <b>Employment</b>               | Employed/working           | 182                          | 35 | 97                             | 49  | 77                           | 37 |
|                                 | Retired                    | 198                          | 38 | 55                             | 28  | 66                           | 32 |
|                                 | Long-term sick or disabled | 70                           | 14 | 13                             | 7   | 48                           | 23 |
|                                 | Other not employed         | 67                           | 13 | 35                             | 18  | 15                           | 7  |
| <b>Self-rated health status</b> | Very good                  | 21                           | 4  | 10                             | 5   | 4                            | 2  |
|                                 | Good                       | 154                          | 30 | 62                             | 31  | 46                           | 22 |
|                                 | Fair                       | 226                          | 44 | 88                             | 44  | 90                           | 44 |
|                                 | Bad                        | 97                           | 19 | 37                             | 19  | 53                           | 26 |
|                                 | Very bad                   | 19                           | 4  | 3                              | 2   | 13                           | 6  |

Table 2 Tests for risk of low quality DCE data

| Discrete Choice Experiment                          | Chronic Pain (DCE1) |       | Breathlessness (DCE2) |       | Chronic Pain (DCE3) |       | Overall |       |
|-----------------------------------------------------|---------------------|-------|-----------------------|-------|---------------------|-------|---------|-------|
|                                                     | N=517               |       | N=200                 |       | N=206               |       | N=923   |       |
| <b>Incidence of individual low-quality criteria</b> |                     |       |                       |       |                     |       |         |       |
| Serial non-participation                            | 7                   | 1.4%  | 5                     | 2.5%  | 5                   | 2.4%  | 17      | 1.8%  |
| Dominance                                           | 56                  | 10.8% | 28                    | 14.0% | 31                  | 15.0% | 115     | 12.5% |
| Response time                                       | 74                  | 14.3% | 33                    | 16.5% | 28                  | 13.6% | 135     | 14.6% |
| <b>Cumulative tests failed per individual</b>       |                     |       |                       |       |                     |       |         |       |
| One or more test failed                             | 115                 | 22.2% | 53                    | 26.1% | 44                  | 21.4% | 209     | 22.6% |
| Two or more tests failed                            | 19                  | 3.7%  | 17                    | 8.4%  | 16                  | 7.8%  | 49      | 5.3%  |
| All three tests failed                              | 3                   | 0.6%  | 5                     | 2.5%  | 4                   | 1.9%  | 12      | 1.3%  |



**Table 3 Multinomial Logit Analysis: higher vs neutral level of person-centredness by attribute and by Discrete Choice Experiment**

| Discrete Choice Experiment      | Chronic Pain (DCE1) |                  | Breathlessness (DCE2) |                  | Chronic Pain (DCE3) |                |
|---------------------------------|---------------------|------------------|-----------------------|------------------|---------------------|----------------|
|                                 | Estimate            | 95% CI           | Estimate              | 95% CI           | Estimate            | 95% CI         |
| <b>Regression coefficient</b>   |                     |                  |                       |                  |                     |                |
| Information                     | 0.65                | (0.58 to 0.73)   | 0.60                  | (0.47 to 0.72)   | 0.93                | (0.79 to 1.07) |
| Situation                       | 0.91                | (0.82 to 0.99)   | 0.90                  | (0.76 to 1.05)   | 1.43                | (1.23 to 1.63) |
| Living well                     | 0.85                | (0.78 to 0.92)   | 0.81                  | (0.68 to 0.93)   | 1.19                | (1.04 to 1.35) |
| Communication                   | 0.21                | (0.15 to 0.26)   | 0.21                  | (0.12 to 0.30)   | 0.31                | (0.20 to 0.42) |
| Cost <sup>2</sup>               | -0.06               | (-0.07 to -0.05) | -0.06                 | (-0.07 to -0.04) | -                   | -              |
| <b>Choice Elasticity (in %)</b> |                     |                  |                       |                  |                     |                |
| Information                     | 12.3                | (11.0 to 13.6)   | 10.6                  | (8.3 to 12.9)    | 15.0                | (12.9 to 17.0) |
| Situation                       | 16.9                | (15.4 to 18.3)   | 16.1                  | (13.6 to 18.6)   | 21.9                | (19.3 to 24.5) |
| Living well                     | 15.8                | (14.5 to 17.1)   | 14.6                  | (12.5 to 16.7)   | 19.4                | (17.2 to 21.6) |
| Communication                   | 3.8                 | (2.7 to 4.8)     | 4.2                   | (2.6 to 5.8)     | 5.4                 | (3.5 to 7.2)   |
| Cost                            | -1.1                | (-1.2 to -0.9)   | -1.0                  | (-1.3 to -0.8)   |                     |                |
| <b>Model statistics</b>         |                     |                  |                       |                  |                     |                |
| Individuals                     | 517                 |                  | 200                   |                  | 206                 |                |
| Observations                    | 12408               |                  | 4800                  |                  | 4944                |                |
| Parameters                      | 5                   |                  | 5                     |                  | 4                   |                |
| Log Likelihood                  | -12004              |                  | -4739                 |                  | -4542               |                |
| BIC                             | 24054               |                  | 9520                  |                  | 9117                |                |

<sup>2</sup> Coefficient for increase by £1 in cost of service

BIC: Bayesian Information Criterion

**Table 4 Coefficients for preferences and class membership for 4 groups from Latent Class Logit modelling (data pooled from patients in DCE1 and DCE2)**

| Latent Class                             | Class 1 – Situation / Living Well |                       | Class 2 - Information |                       | Class 3 – Cost dominant |                         | Class 4 - inconsistent |                         |
|------------------------------------------|-----------------------------------|-----------------------|-----------------------|-----------------------|-------------------------|-------------------------|------------------------|-------------------------|
|                                          | Coefficient.                      | 95% ci                | Coefficient.          | 95% ci                | Coefficient             | 95% ci                  | Coefficient            | 95% ci                  |
| <b>Preferences<sup>1</sup></b>           |                                   |                       |                       |                       |                         |                         |                        |                         |
| Information                              | 0.80                              | (0.72 to 0.88)        | <b>1.95</b>           | <b>(1.78 to 2.13)</b> | 0.24                    | (0.14 to 0.35)          | 0.01                   | (-0.07 to 0.10)         |
| Situation                                | <b>2.08</b>                       | <b>(1.95 to 2.21)</b> | 0.98                  | (0.84 to 1.12)        | 0.31                    | (0.18 to 0.44)          | 0.18                   | (0.08 to 0.28)          |
| Living well                              | <b>1.82</b>                       | <b>(1.70 to 1.94)</b> | 0.78                  | (0.65 to 0.90)        | 0.44                    | (0.32 to 0.55)          | 0.25                   | (0.16 to 0.33)          |
| Communication                            | 0.45                              | (0.37 to 0.52)        | 0.23                  | (0.10 to 0.36)        | 0.11                    | (0.01 to 0.21)          | 0.11                   | (0.03 to 0.20)          |
| Cost                                     | -0.06                             | (-0.07 to -0.06)      | -0.05                 | (-0.06 to -0.04)      | <b>-0.25</b>            | <b>(-0.27 to -0.23)</b> | 0.02                   | (0.01 to 0.02)          |
| <b>Class membership<sup>2</sup></b>      |                                   |                       |                       |                       |                         |                         |                        |                         |
| Constant                                 | -                                 | -                     | -0.77                 | (-1.71 to 0.17)       | 1.00                    | (0.15 to 1.85)          | 0.45                   | (-0.38 to 1.27)         |
| DCE2 <sup>3</sup>                        | -                                 | -                     | -0.21                 | (-0.75 to 0.32)       | -0.02                   | (-0.53 to 0.49)         | 0.07                   | (-0.40 to 0.54)         |
| Relationship: Single <sup>4</sup>        | -                                 | -                     | -0.16                 | (-0.69 to 0.36)       | -0.37                   | (-0.89 to 0.15)         | -0.10                  | (-0.58 to 0.39)         |
| Education: University <sup>5</sup>       | -                                 | -                     | 0.20                  | (-0.29 to 0.69)       | -0.05                   | (-0.54 to 0.43)         | 0.01                   | (-0.44 to 0.46)         |
| Job status: Not working <sup>6</sup>     | -                                 | -                     | -0.18                 | (-0.97 to 0.62)       | -0.08                   | (-0.82 to 0.67)         | -0.30                  | (-1.02 to 0.41)         |
| Job status: Retired <sup>6</sup>         | -                                 | -                     | -0.15                 | (-0.72 to 0.43)       | <b>-0.59</b>            | <b>(-1.17 to -0.01)</b> | <b>-0.81</b>           | <b>(-1.36 to -0.27)</b> |
| Job status: Disabled <sup>6</sup>        | -                                 | -                     | 0.31                  | (-0.67 to 1.29)       | 0.08                    | (-0.82 to 0.99)         | -0.15                  | (-1.00 to 0.70)         |
| Perceived health: Fair <sup>7</sup>      | -                                 | -                     | -0.05                 | (-0.59 to 0.49)       | -0.44                   | (-0.96 to 0.08)         | -0.09                  | (-0.59 to 0.41)         |
| Perceived health: Poor <sup>7</sup>      | -                                 | -                     | -0.58                 | (-1.33 to 0.16)       | <b>-1.06</b>            | <b>(-1.78 to -0.34)</b> | -0.45                  | (-1.11 to 0.21)         |
| Gender: Female <sup>8</sup>              | -                                 | -                     | -0.10                 | (-0.61 to 0.42)       | <b>-0.82</b>            | <b>(-1.31 to -0.33)</b> | <b>-0.62</b>           | <b>(-1.08 to -0.16)</b> |
| Income: £15600-£31199 <sup>9</sup>       | -                                 | -                     | 0.24                  | (-0.46 to 0.95)       | -0.61                   | (-1.22 to 0.01)         | -0.10                  | (-0.70 to 0.50)         |
| Income: £31200+ <sup>9</sup>             | -                                 | -                     | 0.40                  | (-0.34 to 1.15)       | <b>-1.15</b>            | <b>(-1.88 to -0.43)</b> | -0.12                  | (-0.78 to 0.53)         |
| Income: Not prepared to say <sup>9</sup> |                                   |                       | <b>0.93</b>           | <b>(0.08 to 1.78)</b> | -0.19                   | (-1.02 to 0.64)         | -0.13                  | (-1.03 to 0.78)         |
| <b>Class share</b>                       | N                                 | %                     | N                     | %                     | N                       | %                       | N                      | %                       |
| Predicted membership                     | 286                               | 39.9%                 | 137                   | 19.1%                 | 126                     | 17.6%                   | 168                    | 23.4%                   |
| <b>Data quality<sup>1</sup></b>          |                                   |                       |                       |                       |                         |                         |                        |                         |
| Serial Non Participation (N=12)          | 0                                 | -                     | 0                     | -                     | 0                       | -                       | <b>12</b>              | <b>100%</b>             |
| Dominance (N=84)                         | 11                                | 13.1%                 | 6                     | 7.1%                  | 2                       | 2.4%                    | <b>65</b>              | <b>77.4%</b>            |
| Response time (N=107)                    | 4                                 | 3.7%                  | 9                     | 8.4%                  | <b>46</b>               | <b>43.0%</b>            | <b>48</b>              | <b>44.9%</b>            |

1  
2 <sup>1</sup> In the Preferences and Data quality sections, only the dominant values are highlighted in **bold**; <sup>2</sup> in the Class membership section, statistically significant coefficients are  
3  
4 highlighted in **bold**; <sup>3</sup> compared to DCE1; <sup>4</sup> Compared to married /co-habiting; <sup>5</sup> compared to no university education; <sup>6</sup> compared to working; <sup>7</sup> “bad” or “very bad” self-  
5  
6 rated health compared to “good” or “very good”. <sup>8</sup> compared to male; <sup>9</sup> compared to <£15600 per annum  
7  
8  
9  
10  
11  
12  
13  
14  
15  
16  
17  
18  
19  
20  
21  
22  
23  
24  
25  
26  
27  
28  
29  
30  
31  
32  
33  
34  
35  
36  
37  
38  
39  
40  
41  
42  
43  
44  
45  
46  
47  
48  
49

For peer review only

1  
2  
3  
4  
5  
6  
7  
8  
9  
10  
11  
12  
13  
14  
15  
16  
17  
18  
19  
20  
21  
22  
23  
24  
25  
26  
27  
28  
29  
30  
31  
32  
33  
34  
35  
36  
37  
38  
39  
40  
41  
42  
43  
44  
45  
46  
47  
48  
49  
50  
51  
52  
53  
54  
55  
56  
57  
58  
59  
60

Figure 1: Simplified illustration of mapping of different sources to final attributes

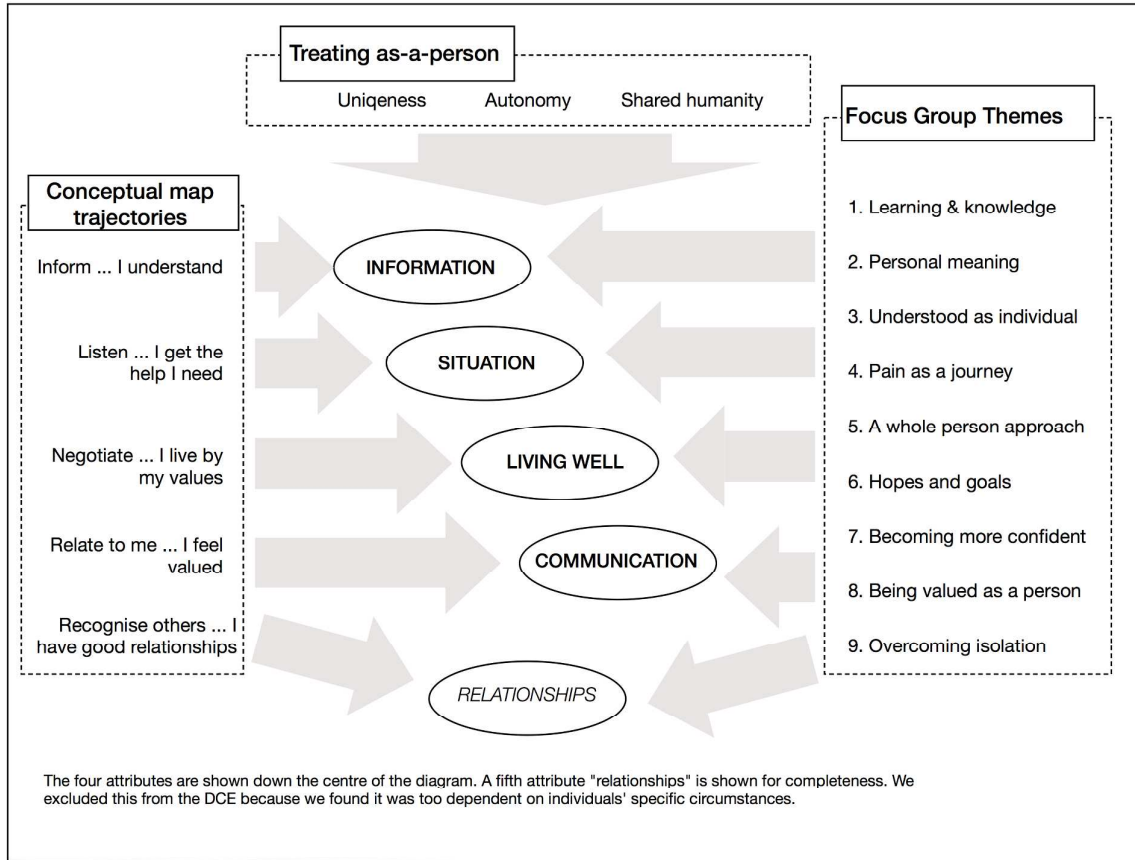

only

1  
2  
3  
4  
5  
6  
7  
8  
9  
10  
11  
12  
13  
14  
15  
16  
17  
18  
19  
20  
21  
22  
23  
24  
25  
26  
27  
28  
29  
30  
31  
32  
33  
34  
35  
36  
37  
38  
39  
40  
41  
42  
43  
44  
45  
46  
47  
48  
49  
50  
51  
52  
53  
54  
55  
56  
57  
58  
59  
60

For peer review only

# Supplementary Methods

## Tests of data quality

### Overview

We analysed the risk of individuals submitting low quality data in three ways First we included a simple dominance test to check for irrational responses. Second, we identified participants who exhibited a systematic choice pattern, e.g. systematically selecting the 1st option as “most preferred”. Third, we analysed the response time for each choice task, allowing identification of participants whose responses to the choices were either much quicker (possibly representing “clicking through” choices rather than stopping to consider) or slower (possibly indicating either difficulty comprehending the choices or distraction by other activities).

### Dominance

In addition to the 12 choice tasks, each DCE included two additional tasks: a “warm-up” choice task and a “dominance” test. The former was used to familiarise participants with the format of the choice questions and act as a transition between the instructions and first live choice task. The dominance task was the last task faced by the participants and included three options: A) all attributes set at their “best” levels (high level of personalisation with lowest level of cost); B) all attributes set at their “worst” levels (neutral personalisation with highest level of cost); and C) an intermediate option. Participants were expected to choose rationally, thus alternative A as “most preferred” and alternative B as “least preferred”. An example choice task is shown in Web Appendix A. Dominance: A respondent was considered as failing dominance test when she/he selected an irrational, “wrong”, alternative for both best and worst choice.

### Systematic choice bias

We measured serial non participation (SNP), the systematic choice based on some criterion other than the content of the attributes in relation to choice order. A respondent was considered as a serial non participant when at least 75% of his/her choices were on the same choice position (e.g. first presented, last presented) for at least one type of decision (either Best or Worst)

### Response time

For each choice task we computed the 1st quintile (20%), the median (50%) and the 4th quintile (80%) of response time (RT). We then used a bootstrapping procedure with 1000 replications to obtain the 95% confidence interval (CI) around the {20%; 50%; 80%} measures. A response time was classified as a fast outlier when its duration was shorter than the lower bound of the 95% confidence intervals for the 1st RT quintile or classified as a slow outlier when its duration was longer than the upper bound of the 95% confidence intervals of the 4th RT quintile. A respondent was considered as an outlier when either  $\geq 50\%$  of response times to decision tasks (i.e. both best and worst decisions for each choice task) were fast outliers, or  $\geq 50\%$  of response times to decision tasks were slow outliers.

## Supplementary Figure: Illustrative example choice task

## QUESTION 5

What kind of support service would you like to use? Each support service would be provided once a week for six weeks. Which would you like the least and which would you like the most?

- Service A
- Provides information that is relevant to you
  - Makes suggestions that fit your current situation
  - Helps you focus on what you want to get from life
  - Communicates with you in a neutral professional way
  - Costs £10 per week

- Service B
- Provides information that is relevant to you
  - Takes little account of your current situation
  - Helps you focus on what you want to get from life
  - Communicates with you in a friendly and personal way
  - Costs £5 per week

- Service C
- Provides everyone with the same information
  - Takes little account of your current situation
  - Seems to think that everyone wants to get the same from life
  - Communicates with you in a neutral professional way
  - Costs £20 per week

1. Which service would you like the **least**?

Service A

Service B

Service C

2. Which service would you like the **most**?

Service A

Service B

Service C



# Supplementary Results

**Table S1 Additional Self-reported characteristics of participants**

|                                   |                    | Chronic Pain |    | Breathlessness |    | Chronic Pain (no cost) |    |
|-----------------------------------|--------------------|--------------|----|----------------|----|------------------------|----|
|                                   |                    | N=517        |    | N=200          |    | N=206                  |    |
|                                   |                    |              | %  |                | %  |                        | %  |
| <b>Chronic Pain Grade</b>         | Grade 0            | 0            | 0  | -              | -  | 0                      | 0  |
|                                   | Grade I            | 80           | 16 | -              | -  | 16                     | 8  |
|                                   | Grade II           | 170          | 33 | -              | -  | 58                     | 28 |
|                                   | Grade III          | 114          | 22 | -              | -  | 52                     | 25 |
|                                   | Grade IV           | 153          | 30 | -              | -  | 80                     | 39 |
| <b>COPD Control Questionnaire</b> | Minimal (< 1)      | -            | -  | 43             | 22 | -                      | -  |
|                                   | Mild (1-1.9)       | -            | -  | 53             | 26 | -                      | -  |
|                                   | Moderate (2-2.9)   | -            | -  | 45             | 22 | -                      | -  |
|                                   | Severe (≥3)        | -            | -  | 59             | 30 | -                      | -  |
| <b>Years of chronic pain</b>      | Less than 1 year   | 58           | 11 | -              | -  | 26                     | 13 |
|                                   | 1- 5 years         | 213          | 41 | -              | -  | 46                     | 22 |
|                                   | 6-10 years         | 107          | 21 | -              | -  | 63                     | 31 |
|                                   | More than 10 years | 139          | 27 | -              | -  | 30                     | 15 |

**Table S2: Regression coefficients, with 95% confidence intervals, for higher vs neutral level of personalisation of attributes from multinomial logit models, for each DCE, after exclusion of participants who failed two or more data quality tests.**

| Attribute                     | Chronic Pain |                | Breathlessness |                | Chronic Pain (no cost) |              |
|-------------------------------|--------------|----------------|----------------|----------------|------------------------|--------------|
|                               | Estimate     | 95% CI         | Estimate       | 95% CI         | Estimate               | 95% CI       |
| <b>Regression coefficient</b> |              |                |                |                |                        |              |
| Information                   | 0.65         | 0.61 to 0.69   | 0.59           | 0.52 to 0.66   | 0.87                   | 0.80 to 0.95 |
| Situation                     | 0.91         | 0.86 to 0.96   | 0.88           | 0.80 to 0.96   | 1.33                   | 1.24 to 1.42 |
| Living well                   | 0.86         | 0.81 to 0.90   | 0.79           | 0.72 to 0.87   | 1.16                   | 1.08 to 1.24 |
| Communication                 | 0.21         | 0.17 to 0.26   | 0.21           | 0.14 to 0.27   | 0.32                   | 0.25 to 0.38 |
| Cost <sup>1</sup>             | -0.06        | -0.06 to -0.06 | -0.06          | -0.06 to -0.05 | -                      | -            |
| <b>Model statistics</b>       |              |                |                |                |                        |              |
| Individuals                   | 498          |                | 186            |                | 190                    |              |
| Observations                  | 11952        |                | 4464           |                | 4560                   |              |
| Parameters                    | 5            |                | 5              |                | 4                      |              |
| Log Likelihood                | -11428       |                | -4330          |                | -4039                  |              |

<sup>1</sup> Coefficient for increase by £1 in cost of service  
BIC: Bayesian Information Criterion

# BMJ Open

## The value of different aspects of person-centred care: a series of discrete choice experiments in people with long-term conditions

|                                 |                                                                                                                                                                                                                                                                                                                                                                                                                                          |
|---------------------------------|------------------------------------------------------------------------------------------------------------------------------------------------------------------------------------------------------------------------------------------------------------------------------------------------------------------------------------------------------------------------------------------------------------------------------------------|
| Journal:                        | <i>BMJ Open</i>                                                                                                                                                                                                                                                                                                                                                                                                                          |
| Manuscript ID                   | bmjopen-2016-015689.R1                                                                                                                                                                                                                                                                                                                                                                                                                   |
| Article Type:                   | Research                                                                                                                                                                                                                                                                                                                                                                                                                                 |
| Date Submitted by the Author:   | 24-Feb-2017                                                                                                                                                                                                                                                                                                                                                                                                                              |
| Complete List of Authors:       | Burton, Christopher; University of Sheffield, Academic Unit of Primary Medical Care<br>Entwistle, Vikki; University of Aberdeen, HSRU<br>Elliott, Alison; University of Aberdeen, Institute of Applied Health Sciences<br>Krucien, Nicolas; Univ Aberdeen, Health Economic Research Unit<br>Porteous, Terry; University of Aberdeen, Health Services Research Unit<br>Ryan, Mandy; University of Aberdeen, Health Economic Research Unit |
| <b>Primary Subject Heading</b>: | Patient-centred medicine                                                                                                                                                                                                                                                                                                                                                                                                                 |
| Secondary Subject Heading:      | Health economics, Health services research                                                                                                                                                                                                                                                                                                                                                                                               |
| Keywords:                       | Quality in health care < HEALTH SERVICES ADMINISTRATION & MANAGEMENT, Self management, person centred care, patient centered care, discrete choice experiment                                                                                                                                                                                                                                                                            |
|                                 |                                                                                                                                                                                                                                                                                                                                                                                                                                          |

SCHOLARONE™  
Manuscripts

Only

1  
2  
3 The value of different aspects of person-centred care: a series of discrete choice experiments in  
4 people with long-term conditions.  
5  
6  
7

8  
9 Authors  
10

11  
12  
13 Christopher Burton, Professor of Primary Care<sup>1</sup>  
14

15 Vikki A Entwistle, Professor of Health Services Research<sup>2</sup>  
16

17 Alison M Elliott, Senior Research Fellow in Primary Care<sup>3</sup>  
18

19 Nicolas Krucien, Research Fellow in Health Economics<sup>4</sup>  
20

21 Terry Porteous, Research Fellow in Health Services Research<sup>2</sup>  
22

23 Mandy Ryan, Professor of Health Economics<sup>4</sup>  
24  
25  
26  
27

- 28  
29 1. Academic Unit of Primary Medical Care, University of Sheffield  
30 2. Health Services Research Unit, University of Aberdeen  
31  
32 3. Institute of Applied Health Sciences, University of Aberdeen  
33  
34 4. Health Economic Research Unit, University of Aberdeen  
35  
36  
37

38 Corresponding author  
39

40 Christopher Burton

41 Academic Unit of Primary Medical Care

42 University of Sheffield

43 Samuel Fox House, Northern General Hospital

44 Sheffield S5 7AU  
45  
46

47 Email [chris.burton@sheffield.ac.uk](mailto:chris.burton@sheffield.ac.uk)

48 Phone +44 (0)1114 222 2216  
49  
50  
51  
52  
53  
54  
55  
56  
57  
58  
59  
60

1  
2  
3 ABSTRACT  
4  
5

6 Objective: To measure the value patients place on different aspects of person-centred care.  
7

8  
9 Design: We systematically identified four attributes of person-centred care. We then measured their  
10 value to 923 people with either chronic pain or chronic lung disease over three discrete choice  
11 experiments (DCEs) about services to support self-management. We calculated the value of each  
12 attribute for all respondents, and identified groups of people with similar preferences using latent  
13 class modelling.  
14  
15  
16  
17  
18  
19

20  
21 Setting: DCEs conducted online via a commercial survey company.  
22  
23

24 Participants: Adults with either chronic pain (two DCEs, N= 517 and 206 respectively) or  
25 breathlessness due to chronic respiratory disease (N=200).  
26  
27  
28

29 Results: Participants were more likely to choose services with higher level person-centred attributes.  
30 They most valued services that took account of a person's current situation (likelihood of selection  
31 increased by 16.9%; 95%CI 15.4 to 18.3) and worked with the person on what they wanted to get  
32 from life (15.8%; 14.5 to 17.1). More personally relevant information was valued less than these  
33 (12.3%; 11.0 to 13.6). A friendly and personal communicative style was valued least (3.8%; 2.7 to  
34 4.8). Latent class models indicated that a substantial minority of participants valued personally  
35 relevant information over the other attributes.  
36  
37  
38  
39  
40  
41  
42  
43  
44

45 Conclusion: This is the first study to measure the value patients place on different aspects of person-  
46 centred care. Professional training needs to emphasise the substance of clinical communication –  
47 working responsively with individuals on what matters to them – as well as the style of its delivery.  
48  
49  
50  
51  
52  
53  
54  
55  
56  
57  
58  
59  
60

## Article Summary

### Strengths and limitations of this study

- This is the first study to quantify the value which patients place on different aspects of person-centredness.
- Person-centred care is a complex concept: we designed the attributes for the discrete choice experiments using a rigorous process involving both theoretical and empirical work followed by two cycles of development and testing.
- Despite this, the study was limited to four attributes of person-centredness which inevitably cannot encompass the full richness of this concept.
- We conducted three experiments, each with a version of the same core discrete choice experiment, to reduce the risk that our results were biased by our choice of methods or population and to increase generalisability.
- The experiments were sufficiently powered to identify and characterise sub-groups of patients with similar patterns of values.

## INTRODUCTION

Person-centred care is key to high quality healthcare [1]. Person-centred care, along with its near-synonym patient-centred care, is a complex concept that has been analysed and operationalized in a number of overlapping ways for different contexts and purposes [1-7]. One widely used definition summarises it as “respectful and responsive to individual patient preferences, needs, and values, and ensuring that patient values guide all clinical decisions” [4]. More theoretical analyses start from a consideration of patients as persons and what this means for how health services and staff should (ethically) relate to them [2,5]. Although they use a variety of terms, they tend to emphasise the importance of: recognising and taking into account each patients’ subjective experiences of health problems and healthcare, including how these fit into their personal biography or narrative, and impact their self-identity; working with sensitivity to each patient’s particular situation, including their social relationships and material circumstances; and respecting and relating to each patient as a moral agent, for example by sharing decision-making rather than imposing decisions about potential healthcare interventions [2-7].

From a patient’s perspective, person centred care can depend, among other things, on practitioners adopting an appropriate communication style, providing personally relevant information, taking appropriate account of their personal circumstances, and working with them on what matters to them ( or what they want to get from life) [8, 9]. Of these, communication style is perhaps most often addressed in health professional training, although an emphasis on communication skills rather than deeper interpersonal attitudes and value commitments has been criticised [10, 11]. No studies have quantified how much different aspects of person-centred care matter to patients.

Alongside the emphasis on person-centred care, there is a drive to support people with long-term conditions to “self-manage” [12, 13]. Recent critiques of health services’ support for self-management have suggested that it is often delivered in ways that fall short of aspirations for person-centred care [14]. First, services often rely on a “one-size-fits-all” approach, although people

1  
2  
3 have diverse capabilities and needs for support [15]. Second, interventions and approaches are often  
4  
5 influenced by professionals' biomedical perspectives [16] rather than what people value for living  
6  
7 well with their conditions [16]. Third, while much self-management support focuses on providing  
8  
9 individuals with knowledge, skills and motivation, the barriers to effective self-management  
10  
11 commonly lie in people's broader social and material environments [17-20]. Support for self-  
12  
13 management thus provides an important context for the study of person-centred care.  
14

15  
16 We aimed to measure what matters to patients in relation to person-centred care by conducting a  
17  
18 series of discrete choice experiments about services to support self-management for people with  
19  
20 long term conditions. We hypothesised that individuals would vary in how much they valued  
21  
22 different aspects of person-centred care but did not specify a magnitude of difference or specify that  
23  
24 any particular attribute would be consistently more highly valued.  
25  
26  
27  
28  
29  
30  
31

## 32 **METHODS**

33 Discrete choice experiments (DCEs) enable researchers to measure individuals' preferences by  
34  
35 calculating the value they place on particular attributes [21]. They involve participants completing a  
36  
37 set of hypothetical choice tasks, each of which involves choosing between two or more alternatives.  
38  
39 The alternatives are described in terms of multiple attributes, with levels which are systematically  
40  
41 varied across the choice tasks. Participants' responses are analysed to measure the influence of the  
42  
43 different levels of attributes on choices.  
44  
45

46  
47 We designed and used DCEs in three linked studies, two among people with chronic pain and one  
48  
49 among people with breathlessness due to chronic respiratory disease. Both conditions are common  
50  
51 and directly affect individuals through current symptoms. Self-management of these conditions  
52  
53 requires adaptation to the limitations caused by the condition [16], but does not include technical  
54  
55 tasks such as monitoring blood tests or treatment. Each of the three DCEs used the same attribute  
56  
57  
58  
59  
60



1  
2  
3 levels and set of choice tasks, with minor contextual changes to the wording. The second chronic  
4  
5 pain DCE was similar to the first except that we excluded any reference to the cost of a service, to  
6  
7 avoid potential bias of results due to cost.  
8  
9

### 10 **Development of the DCE**

11  
12 DCEs typically include attributes and levels which describe the process of care, and are easily defined  
13  
14 (e.g. consulting a doctor versus seeing a nurse) or easily quantified (e.g. waiting for different lengths  
15  
16 of times). In this study we sought to value attributes which describe the nature of care – its person-  
17  
18 centredness - which is less easily defined in single statements or which may be interpreted in  
19  
20 different ways [22]. To address this challenge and ensure that the DCE was valid and reliable, we  
21  
22 followed best practice to design, develop and test the DCE through three stages: attribute selection;  
23  
24 attribute testing and development; and pilot survey. To do this, we drew on recent theoretical [15]  
25  
26 and empirical research [8], and conducted focus group discussions and think-aloud interviews [23] in  
27  
28 which participants talked through their responses to draft versions of the DCE. As there were far  
29  
30 more possible combinations of attributes and levels than we could test, we designed the DCE to  
31  
32 provide maximal statistical efficiency for a manageable length of questionnaire by applying D-  
33  
34 Efficient design with a Bayesian approach [24]. This involved conducting a preliminary DCE with 117  
35  
36 participants in order to develop a “well-informed” experimental design for the main study.  
37  
38  
39  
40

#### 41 *Attribute selection*

42  
43 We began the process of attribute selection from three starting points. First was the idea that the  
44  
45 overall aim of support for self-management is to enable people “to live well with long-term  
46  
47 conditions” [15]. Second, we used the notion that person-centredness is primarily a matter of  
48  
49 treating everyone “as a person” [2]. Treating someone as a person includes recognising and  
50  
51 responding to their individual characteristics and preferences. It also includes respecting them as a  
52  
53 fellow human, recognition of their unique biography and identity, and support for their autonomy to  
54  
55 shape and live their lives according to their own values rather than those of others. Third, we used a  
56  
57  
58  
59  
60

1  
2  
3 conceptual map of what matters to patients about how healthcare is delivered [8] which considers  
4  
5 items in three categories: “*what health services are like and do*”, “*how they relate to me*” and “*what*  
6  
7 *they enable me to do*”.

8  
9  
10 We explored these, and other, ideas around person-centredness in relation to support for self-  
11  
12 management in six focus groups, each comprising between 5 and 7 individuals. Three groups  
13  
14 involved people with chronic pain (members of two peer support groups and individuals recruited  
15  
16 through a pain clinic), two groups involved non-clinical providers of support for self-management of  
17  
18 long-term conditions, and one group came from a multidisciplinary pain team (to provide  
19  
20 professional triangulation of the patient perspective). Groups lasted between 40 and 65 minutes and  
21  
22 began by open discussion, following a topic guide, about ways in which support for self-management  
23  
24 may be made personal. Later in the groups, we presented 6 provisional attributes of person-  
25  
26 centredness, each with 2 or 3 levels, for discussion. Focus groups were audio-recorded, transcribed  
27  
28 and analysed thematically. In conducting and analysing the focus groups we did not aim for  
29  
30 exhaustive recruitment, or in-depth qualitative analysis. Rather the focus groups were used as  
31  
32 sources of contextual and confirmatory (or disconfirming) data, to be used - alongside our own and  
33  
34 others’ conceptual work and empirical evidence – in developing the attributes and levels of the DCE.  
35  
36  
37  
38  
39 In the attribute selection phase we recognised that the data from these different sources overlapped  
40  
41 in various ways. For the DCE design, however, we needed a manageable number of well  
42  
43 differentiated (ideally potentially independent) attributes that described (aspects of) person-  
44  
45 centredness from a patient’s perspective. We chose to focus on four aspects of person-centredness,  
46  
47 summarised as information, situation, living well and communicative style. A simplified view of the  
48  
49 relationship between these aspects and the developmental sources is shown in Figure 1.  
50  
51

#### 52 53 *Attribute development and testing*

54  
55 We carried out two cycles of development and testing of attributes and their associated levels. Each  
56  
57 cycle comprised three stages: drafting of attribute-level statements, cognitive testing of these  
58  
59  
60

1  
2  
3 statements using think-aloud interviews [23], and evaluation of the think-aloud results. Statements  
4  
5 were drafted and revised by all members of the research team in order that they would be broadly  
6  
7 applicable and easily and consistently understood. We conducted think-aloud interviews with a total  
8  
9 of 17 people with chronic pain, 6 of whom had participated in the focus groups; ten took part in the  
10  
11 first cycle and seven in the second. During the think-aloud interviews, participants completed a  
12  
13 paper-based version of the DCE using the current attributes and were asked to describe their  
14  
15 thoughts about the attributes and levels, and their decisions, as they did so. Think-aloud interviews  
16  
17 were audio-recorded, transcribed and analysed to identify areas for clarification. Evaluation at the  
18  
19 end of the first cycle led to revision of attribute-level statements to be used in the second cycle. In  
20  
21 particular, we found that respondents experienced problems when three levels were assigned to  
22  
23 each attribute. If these were neutral, high and very high, some people found the very high level  
24  
25 excessive, and there was some variation in how people interpreted which of the two higher levels  
26  
27 was better. However if the levels were low (i.e. actively not person-centred) neutral and high, people  
28  
29 made choices to avoid the low rather than choose between the two higher attributes. As we were  
30  
31 interested in how people positively valued more person-centred care, rather than their negative  
32  
33 valuing of impersonal care, we limited the levels for each attribute to two, designed to represent:  
34  
35 neutral and high person-centredness.  
36  
37  
38  
39

#### 40 *Final attribute wording*

41  
42 The four final person-centredness attributes and their levels are listed in box 1. The attributes were  
43  
44 presented in relation to services to support self-management for chronic pain (DCEs 1 & 3) and  
45  
46 chronic lung disease (DCE 2). In addition to the four person-centredness attributes, we also included  
47  
48 a cost attribute in DCEs 1 and 2, presented as the cost per week for a 6-week programme. This had  
49  
50 four levels ranging from £5 to £20 per week. We included the cost attribute in order to be able to  
51  
52 estimate willingness to pay, a monetary measure of benefit . To address a concern that the inclusion  
53  
54 of cost might bias the results (in the UK the NHS does not charge patients for treatment at the point  
55  
56  
57  
58  
59  
60

1  
2  
3 of consumption) we modified the design in our third DCE to exclude the cost attribute; this allowed  
4  
5 us to compare responses with and without a cost attribute.  
6  
7

### 8 **Content of the DCEs**

9  
10 The DCEs included 12 choice tasks per participant. Each choice task involved choosing between three  
11  
12 service specifications with different attribute-level sets. The attributes and their levels are  
13  
14 summarised in table 1 and an example of one choice task is displayed in Supplementary Figure 1.  
15  
16 Participants first selected their least preferred option and then selected their most preferred option  
17  
18 - a best-worst scaling type 3 approach [25]. The questionnaire also included questions about age,  
19  
20 gender, domestic status, education, household income and self-rated overall health. Severity of  
21  
22 chronic pain was assessed using the Chronic Pain Grade [26] and severity of chronic lung disease was  
23  
24 assessed using the Clinical COPD Questionnaire [27].  
25  
26  
27

### 28 **Participants and delivery of the DCEs**

29  
30 The DCEs and accompanying questions were delivered online through the research company  
31  
32 ResearchNow™. Participants were UK-based members of the company's online panel who were  
33  
34 aged 16 or over, who had one or more self-reported conditions associated with chronic pain (e.g.  
35  
36 osteoarthritis, fibromyalgia) or breathlessness (e.g. asthma, COPD), and whose response to  
37  
38 screening questions indicated current pain or breathlessness. For chronic pain the screening  
39  
40 required affirmative responses to two questions based on an international definition of chronic pain  
41  
42 [28]: "Are you currently troubled by pain or discomfort, either all the time or on and off?" and "Have  
43  
44 you had this pain or discomfort for more than three months?". For breathlessness we required a  
45  
46 score of 2 or more using the Royal College of Physicians 3-item questionnaire for asthma [29] which  
47  
48 indicates respiratory symptoms most days with an impact on either activity or sleep. Each DCE was  
49  
50 made available by the research company until the target number of eligible participants had  
51  
52 completed it. The DCEs were conducted between May and August 2015.  
53  
54  
55  
56  
57  
58  
59  
60

## Tests of data quality

We analysed the risk of individuals submitting low quality data in three ways, serial non-participation, dominance and response time; these are detailed in the Supplementary Methods. The primary analysis for each of the three DCEs included data from all participants, however we also conducted a sensitivity analysis in which participants who failed two or more data quality tests were excluded.

## Data analysis

### *Value of person-centredness attributes*

We estimated the effects of higher person-centredness of each attribute on participants' choices using logistic regression with a multinomial logit (MNL) model. For each attribute, we reported the direct choice elasticity (the absolute change in the probability of a service being chosen when the attribute was switched from a "neutral" to "high" level of person-centredness). The analysis was conducted separately for each DCE.

### *Patterns of similar value of person-centredness attributes*

We explored patterns of preference using a latent class MNL model (LC-MNL) [30] to produce a set of classes, each representing one pattern of valuation of the different attributes. We estimated six LC-MNL models including between two and eight classes and retained the model with the lowest Bayesian information criterion (BIC). We then sorted individuals into the different classes and examined associations between latent class membership and individuals' data quality and personal characteristics (e.g. gender, education level, etc.). For this analysis, we combined data from the first chronic pain DCE (including the cost attribute) and the breathlessness DCE.

### *Sample size*

We set target sample sizes for the three DCEs of 500, 200 and 200 participants respectively. These had more than adequate power to investigate average preferences [31] but were inflated to permit

1  
2  
3 the latent class modelling. The design of the DCE was carried out with Ngen 1.1.1 and the analysis  
4  
5 was conducted with R 3.2.3.  
6  
7

### 8 **Patient involvement**

9  
10 Representatives from two patient groups were members of the study management group (although  
11  
12 only one was able to participate actively throughout). The development of the study was informed  
13  
14 by prior and contemporaneous research exploring patients' views on what constituted person-  
15  
16 centred care. We used the focus group and think-aloud stages to ensure that the content of the  
17  
18 DCEs addressed key issues for patients in a comprehensible way. Two patient groups assisted with  
19  
20 recruitment to the focus group and think-aloud stages.  
21  
22

### 23 **Ethics**

24  
25 The study was approved by the North of Scotland Research Ethics Service (reference 14/NS/0075).  
26  
27  
28 Participants in the developmental stages all provided informed consent to take part. Consent for  
29  
30 participants in the DCEs was managed by ResearchNow.  
31  
32

## 33 **RESULTS**

### 34 **Participant characteristics**

35  
36 517 individuals completed the main chronic pain DCE (DCE1); 200 individuals completed the  
37  
38 breathlessness DCE (DCE2) and 206 completed the chronic pain (no-cost) DCE (DCE3). Their key  
39  
40 characteristics are listed in table 2 and in Supplementary Table S1. Across the three DCEs, between  
41  
42 10 and 20% of participants had experience of self-management support through a professional  
43  
44 programme (e.g. pain management or pulmonary rehabilitation) or a peer support group.  
45  
46  
47  
48  
49

### 50 **DCE data quality**

51  
52 Results for the individual tests for risk of low data quality are shown in Table 3. Overall data quality  
53  
54 was good: 714 participants failed no tests (77.4%), 160 failed one (17.3%), 37 failed two (4.0%) and  
55  
56  
57  
58  
59  
60

1  
2  
3 12 (1.3%) failed all three. There was no difference in data quality between studies (chi-square = 9.34,  
4  
5  $p = 0.15$ ). The most common indicator of potentially low data quality was (short) response time.  
6  
7

### 8 **Value of person-centredness attributes**

9  
10 In each DCE, there was a clear and consistent difference between attributes in their estimated  
11  
12 values. Table 4 shows the results for each of the DCEs: the attributes for which a higher level of  
13  
14 person-centredness was most valued were situation (taking account of a person's current situation)  
15  
16 and living well (working with them on what they wanted to get from life). More personally relevant  
17  
18 information (contrasted with the same information for everyone) was valued less than these and a  
19  
20 friendly and personal communicative style (contrasted with a neutral professional style) was valued  
21  
22 least. Overall, higher person-centredness of the situation and living well attributes were valued four  
23  
24 times more than higher person-centredness of communicative style. The similarity of findings  
25  
26 between the two DCEs with a cost attribute in different conditions suggests the findings are not  
27  
28 condition-specific, and the similarity between these two and the second pain DCE suggests that  
29  
30 asking people about paying for services did not substantially affect preferences. The sensitivity  
31  
32 analysis reported in Supplementary Table S2 shows that excluding those participants who failed at  
33  
34 least two of the data quality tests had minimal effects on the results.  
35  
36  
37  
38

### 39 **Patterns of similar value of person-centredness attributes**

40  
41 The latent class analysis included 717 participants. The optimal model had 4 classes. The results are  
42  
43 shown in table 5; the upper part shows the regression coefficients for the five attributes of each  
44  
45 class, and the lower part the association of each class with demographic, economic and data quality  
46  
47 variables. Based on the features of individuals allocated probabilistically to the four classes we  
48  
49 characterised them as follows: Class 1 - "Situation / living well dominant": this was the largest group  
50  
51 (N=286, 39.9%) and had a similar pattern of coefficients to the aggregate study population. Class 2 -  
52  
53 "Information dominant": this group (N=137, 19.1%) valued personalised information more highly  
54  
55 than other characteristics. Class 3 - "Cost minimisers": this group (N=126, 17.6%) showed the  
56  
57  
58  
59  
60

1  
2  
3 strongest aversion to cost with weak preferences for person-centredness of the attributes. More  
4  
5 than a third of this group were fast responders to items suggesting that rather than weighing up  
6  
7 choices, they made choices heuristically, driven by cost; members of this group were more likely  
8  
9 than the other groups to have a low income (<£15,600 pa). Although the coefficients for the person-  
10  
11 centredness attributes were smaller in this class compared to classes 1 and 2, they were still  
12  
13 significantly positive and followed a similar pattern to the overall sample results. Class 4 -  
14  
15 “Inconsistent data”: this group (N=168, 23.4%) showed no strong preference for person-centredness  
16  
17 in the attributes and had a weakly positive coefficient for cost which was unexpected as it implies a  
18  
19 willingness to pay more for less valued attributes. Members of this group were much more likely to  
20  
21 fail tests of data quality than those in other groups, suggesting that these results may represent  
22  
23 failure to comprehend tasks (the dominance test) or quickly “clicking through” answers without  
24  
25 considering them (the response time test).  
26  
27  
28

## 29 30 **DISCUSSION**

31 Patients valued two aspects of person-centredness more highly than others. These were attention to  
32  
33 their personal situation and orientation to what matters to them for living well. A substantial  
34  
35 minority valued personal relevance of information provision most highly. A more friendly and  
36  
37 personal communicative style was consistently valued least.  
38  
39

40  
41 This is the first study, to our knowledge, to use discrete choice experiments in health services  
42  
43 research to examine such highly personal attributes of health care delivery. DCEs, which are widely  
44  
45 used in economics, represent the most appropriate method to answer our research question.  
46

47 Neither simpler questionnaire surveys nor qualitative research, despite its invaluable depth and  
48  
49 theoretical rigour, can quantify values for preferences. Observational studies of practice would be  
50  
51 vulnerable to multiple confounders and outcomes may be only weakly connected to processes [32].  
52

53  
54 The attributes were developed from prior theoretical and empirical work and refined and tested  
55  
56 through a series of stages following best practices for DCE development. By using an online panel we  
57  
58  
59  
60



1  
2  
3 obtained large samples: in the case of the chronic pain DCEs, participants had similar characteristics  
4  
5 to an earlier population cohort study [33]. We conducted three separate DCEs with overlapping  
6  
7 designs to establish generalisability beyond a single condition and to ensure that the findings were  
8  
9 not an artefact of including a cost attribute. The large sample size and use of best-worst scaling  
10  
11 allowed us to conduct latent class analysis and define four categories, with two in particular  
12  
13 demonstrating contrasting but highly plausible preference types.  
14

15  
16 Although robustly derived and tested, the four attributes, even at the higher levels of person-  
17  
18 centredness, do not add up to a complete account of person-centred care [1-4, 6]. It is possible that  
19  
20 the wording of attribute descriptions may have biased the results by creating a larger “gap” between  
21  
22 the neutral and higher levels of person-centredness for some attributes than others. We attempted  
23  
24 to minimise this by careful testing of the wording in the development stages and by only offering  
25  
26 choices between neutral and higher levels so as to avoid negative values for particularly poor forms  
27  
28 of practice (values for avoiding loss are typically weighted differently from values for potential gains  
29  
30 [34]). We acknowledged the possibility that the data would contain systematic error introduced by  
31  
32 the challenge of completing the DCE. Rather than simply eliminate data of low quality (and  
33  
34 potentially introduce bias due to the choice of quality criteria), we chose first to include all data in  
35  
36 the primary analysis, secondly to conduct a sensitivity analysis in which data with high risk of low  
37  
38 quality were excluded, and thirdly to conduct the latent class analysis which identified a group of  
39  
40 patents with inconsistent and weak preferences which included many of the individuals who met  
41  
42 criteria for low data quality. While our findings make it clear that some aspects of person-centred  
43  
44 care do matter more than others, they act as a starting point for further enquiry including where  
45  
46 sufficiency thresholds lie (as described above, we compared enhanced attributes against neutral, not  
47  
48 negative ones); whether particular combinations of features are important; and whether  
49  
50 preferences change over the course of illness or in different healthcare contexts. These may require  
51  
52 different study designs and interpretive approaches.  
53  
54  
55  
56  
57  
58  
59  
60

1  
2  
3  
4  
5  
6 Making support for self-management more person-centred involves working on a complex cluster of  
7 attitudes and practices. This study shows that people place a high value on support that pays  
8 attention to their particular situation and on the orientation of support to what matters to them for  
9 living well with their condition. We also found that people vary in the value they place on different  
10 aspects of person-centredness and for a substantial minority the provision of personally relevant  
11 information was the most valued attribute. One striking finding was that the least valued aspect of  
12 person-centredness was that of adopting a “friendly and personal” communicative tone compared  
13 to a more neutral professional one. This is important, given the current/conventional emphasis on  
14 communication skills training for professionals, which has only infrequently been challenged [10,  
15 35]. Our findings lend support to the view that person-centred communication needs to be  
16 underpinned by a broad sense of purpose that orients its content to enable the person to act in their  
17 situation and towards what matters to them in life. Without that kind of purpose, attention to the  
18 style of communication is unlikely to achieve the responsiveness or scope for patient engagement  
19 that is sought. While our study was limited to support for self-management, the findings are likely to  
20 be more widely generalisable; recent work in acute settings has shown that patients rate  
21 communication which focuses on purpose, even when it has little or no emotional engagement, as  
22 excellent [11].

23  
24  
25  
26  
27  
28  
29  
30  
31  
32  
33  
34  
35  
36  
37  
38  
39  
40  
41  
42  
43  
44 In the introduction we described person-centred care as a complex concept with multiple aspects.  
45 Our findings of heterogeneity in the valuation of four of these aspects (our attributes) make it clear  
46 that individuals vary in which features of person-centred care matter to them most. One size does  
47 not fit all and providers need to be conscious of this. These differences were not associated with  
48 broad social or demographic features. An emphasis on “treating as a person” – recognising and  
49 cultivating an individual’s “person-al” capabilities [2] - leads to some challenging issues. It is not clear  
50 how this can be achieved, and it is quite possible that individuals and their healthcare providers have  
51  
52  
53  
54  
55  
56  
57  
58  
59  
60

1  
2  
3 conflicting priorities and values. Despite these challenges, the values which patients place on these  
4  
5 attributes emphasises the importance for healthcare of providing person-centred (or “person-  
6  
7 supportive”) [2] care.  
8  
9

## 10 **CONCLUSION**

11 The aspects of person-centred support for self-management that people with long-term conditions  
12  
13 most value are attention to their personal situation and an orientation to what matters to them in  
14  
15 life. Investment in training to improve professionals’ skills must address the substance of clinical  
16  
17 communication – working responsively with individuals on what matters to them – as well as its  
18  
19 style.  
20  
21  
22  
23  
24  
25  
26  
27  
28  
29  
30  
31  
32  
33  
34  
35  
36  
37  
38  
39  
40  
41  
42  
43  
44  
45  
46  
47  
48  
49  
50  
51  
52  
53  
54  
55  
56  
57  
58  
59  
60

### *Funding & Sponsorship*

The study was funded by the Health Foundation (reference THF 7264) and sponsored by the University of Aberdeen. Neither funder nor sponsor had any involvement in the conduct or reporting of the study.

### *Acknowledgements*

We wish to thank the members of Aberdeen & District Fibromyalgia support group and Grampian Pain Support for encouraging participation in the study and particularly to two of their members who took active roles as members of the study management committee.

### *Conflict of Interest*

All authors have completed the ICMJE uniform disclosure form at [www.icmje.org/coi\\_disclosure.pdf](http://www.icmje.org/coi_disclosure.pdf) and declare: no support from any organisation for the submitted work; no financial relationships with any organisations that might have an interest in the submitted work in the previous three years; no other relationships or activities that could appear to have influenced the submitted work.

### *Contributorship*

The study was conceived by CB, MR, AE and VE. All authors were involved in the planning, design, conduct and reporting of the study. TP conducted the focus groups and think-aloud studies and carried out the initial analysis of these. CB and VE led the wording of attributes and NK conducted the analysis of DCE results. All authors contributed to the writing and revision of the manuscript. CB is guarantor for the study.

### Data sharing statement

We will review any application to share the data on a case by case basis.

1  
2  
3  
4  
5  
6 Transparency

7  
8  
9 The lead author (CB) affirms that the manuscript is an honest, accurate, and transparent account of  
10 the study being reported; that no important aspects of the study have been omitted; and that any  
11 discrepancies from the study as planned have been explained.  
12  
13  
14

15  
16  
17  
18  
19  
20 Copyright

21  
22  
23 The Corresponding Author has the right to grant on behalf of all authors and does grant on behalf of  
24 all authors, a worldwide licence to the Publishers and its licensees in perpetuity, in all forms, formats  
25 and media (whether known now or created in the future), to i) publish, reproduce, distribute, display  
26 and store the Contribution, ii) translate the Contribution into other languages, create adaptations,  
27 reprints, include within collections and create summaries, extracts and/or, abstracts of the  
28 Contribution, iii) create any other derivative work(s) based on the Contribution, iv) to exploit all  
29 subsidiary rights in the Contribution, v) the inclusion of electronic links from the Contribution to  
30 third party material where-ever it may be located; and, vi) licence any third party to do any or all of  
31 the above.  
32  
33  
34  
35  
36  
37  
38  
39  
40  
41  
42  
43  
44  
45  
46  
47  
48  
49  
50  
51  
52  
53  
54  
55  
56  
57  
58  
59  
60

## References:

- 1 Epstein RM, Fiscella K, Lesser CS, et al. Why The Nation Needs A Policy Push On Patient-Centered Health Care. *Health Affairs* 2010;29:1489-95
- 2 Entwistle VA, Watt IS. Treating patients as persons: a capabilities approach to support delivery of person-centered care. *Am J Bioeth* 2013;13:29-39
- 3 Berwick DM. What 'patient-centered' should mean: confessions of an extremist. *Health Aff (Millwood)* 2009;28:w555-65
- 4 Institute of Medicine. Institute of Medicine. Crossing the Quality Chasm: A New Health System for the 21st Century. Washington, D.C.: National Academy Press, 2001
- 5 Ekman I, Swedberg K, Taft C, et al. Person-centered care--ready for prime time. *Eur J Cardiovasc Nurs* 2011;10:248-51
- 6 Lepage AF, Gzil M, Cammeli C, et al. Person-centredness: conceptual and historical perspectives. *Disabil Rehab* 2007; 29:1555-1565
- 7 McCormack B, McCance TV. Development of a framework for person-centred nursing. *J Adv Nurs* 2006; 56: 472-479
- 8 Entwistle V, Firnigl D, Ryan M, et al. Which experiences of health care delivery matter to service users and why? A critical interpretive synthesis and conceptual map. *J Health Serv Res Policy* 2012;17:70-8
- 9 Ryan M, Kinghorn P, Entwistle VA, et al. Valuing patients' experiences of healthcare processes: towards broader applications of existing methods. *Soc Sci Med* 2014;106:194-203
- 10 Wright EB, Holcombe C, Salmon P. Doctors' communication of trust, care, and respect in breast cancer: qualitative study. *BMJ* 2004;328:864
- 11 Young B, Hill J, Gravenhorst K, et al. Is communication guidance mistaken? Qualitative study of parent-oncologist communication in childhood cancer. *Br J Cancer* 2013;109:836-43
- 12 Lorig KR, Holman H. Self-management education: history, definition, outcomes, and mechanisms. *Ann Behav Med* 2003;26:1-7.
- 13 Townsend A, Wyke S, Hunt K. Self-managing and managing self: practical and moral dilemmas in accounts of living with chronic illness. *Chronic Illness* 2006;2:185-94.
- 14 Kendall E, Rogers A. Extinguishing the social?: state sponsored self-care policy and the Chronic Disease Self-management Programme. *Disability & Society* 2007;22:129-43.
- 15 Entwistle VA, Cribb A. Enabling people to live well. London, The Health Foundation 2013.
- 16 Taylor S, Pinnock H, Epiphanou E, et al. A rapid synthesis of the evidence on interventions supporting self-management for people with long-term conditions: PRISMS - Practical systematic Review of Self-Management Support for long-term conditions. *Health Serv Deliv Res* 2014;2

1  
2  
3 17 Morgan HM, Entwistle VA, Cribb A, et al. We need to talk about purpose: a critical interpretive  
4 synthesis of health and social care professionals' approaches to self-management support for people  
5 with long-term conditions. *Health Expect* 2016  
6

7 18 Dowrick C, Kokanovic R, Hegarty K, et al. Resilience and depression: perspectives from primary  
8 care. *Health (London)* 2008;12:439-52  
9

10 19 Hinder S, Greenhalgh T. "This does my head in". Ethnographic study of self-management by  
11 people with diabetes. *BMC Health Serv Res* 2012;12:83,6963  
12

13 20 Sinding C, Miller P, Hudak P, et al. Of time and troubles: patient involvement and the production  
14 of health care disparities. *Health (London)* 2012;16:400-17  
15

16 21 Clark MD, Determann D, Petrou S, et al. Discrete choice experiments in health economics: a  
17 review of the literature. *Pharmacoeconomics* 2014;32:883-902  
18

19 22 Epstein RM, Franks P, Fiscella K, et al. Measuring patient-centered communication in patient-  
20 physician consultations: theoretical and practical issues. *Soc Sci Med* 2005;61:1516-28  
21

22 23 Ryan M, Watson V, Entwistle V. Rationalising the 'irrational': a think aloud study of discrete  
23 choice experiment responses. *Health Econ* 2009;18:321-36  
24

25 24 Ferrini S, Scarpa R. Designs with a priori information for nonmarket valuation with choice  
26 experiments: A Monte Carlo study. *J Environ Econ Manage* 2007;53:342-63  
27

28 25 Lancsar E, Louviere J, Donaldson C, et al. Best worst discrete choice experiments in health:  
29 Methods and an application. *Soc Sci Med* 2013;76:74-82.  
30

31 26 Von Korff M, Ormel J, Keefe FJ, et al. Grading the severity of chronic pain. *Pain* 1992;50:133-49.  
32

33 27 van dM, Willemse BWM, Schokker S, et al. Development, validity and responsiveness of the  
34 Clinical COPD Questionnaire. *Health and Quality of Life Outcomes* 2003;1:13- doi:10.1186/1477-  
35 7525-1-13.  
36

37 28 International Association for the Study of Pain. Classification of chronic pain. . *Pain*  
38 1986;Supplement 3 (1986) S1-S226.  
39

40 29 Pearson MG, Bucknall CE. Measuring clinical outcome in asthma: a patient focused approach.  
41 London: Royal College of Physicians 1999.  
42

43 30 Greene WH, Hensher DA. A latent class model for discrete choice analysis: contrasts with mixed  
44 logit. *Transportation Research Part B: Methodological* 2003;37:681-98  
45

46 31 de Bekker-Grob EW, Donkers B, Jonker MF, et al. Sample Size Requirements for Discrete-Choice  
47 Experiments in Healthcare: a Practical Guide. *The Patient - Patient-Centered Outcomes Research*  
48 2015;8:373-84  
49

50 32 Lilford RJ, Brown CA, Nicholl J. Use of process measures to monitor the quality of clinical practice.  
51 *BMJ* 2007;335:648-50  
52  
53  
54  
55  
56  
57  
58  
59  
60

1  
2  
3 33 Elliott AM. Chronic pain in the community: its prevalence, impact and natural history PhD Thesis,  
4 University of Aberdeen, 2000.

5  
6 34 Kahneman D, Tversky A. Prospect theory: An analysis of decision under risk. *Econometrica*:  
7 *Journal of the Econometric Society* 1979:263-91.

8  
9 35 Salmon P, Young B. The validity of education and guidance for clinical communication in cancer  
10 care: evidence-based practice will depend on practice-based evidence. *Patient Educ Couns*  
11 2013;90:193-9  
12

13  
14  
15  
16  
17  
18  
19  
20  
21  
22  
23  
24  
25  
26  
27  
28  
29  
30  
31  
32  
33  
34  
35  
36  
37  
38  
39  
40  
41  
42  
43  
44  
45  
46  
47  
48  
49  
50  
51  
52  
53  
54  
55  
56  
57  
58  
59  
60

For peer review only



Table 1 Attributes and levels for the discrete choice experiments.

| ATTRIBUTE LABEL | ATTRIBUTE DESCRIPTION                                                                                                                                                                                                    | ATTRIBUTE LEVELS                                                                                                                  |
|-----------------|--------------------------------------------------------------------------------------------------------------------------------------------------------------------------------------------------------------------------|-----------------------------------------------------------------------------------------------------------------------------------|
| Information     | By “information” we mean information about pain <sup>1</sup> , the conditions that cause it, and the different ways there are of managing it.                                                                            | Provides everyone with the same information (NEUTRAL)<br>Provides information that is relevant to you (HIGH)                      |
| Situation       | By “current situation” we mean things like where you live, who you live with, what resources you have, what you usually do for yourself and others, and how pain <sup>1</sup> currently affects that.                    | Takes little account of your current situation (NEUTRAL)<br>Makes suggestions that fit your current situation (HIGH)              |
| Living well     | By “what you want to get from life” we mean the things that really matter to you, especially the kinds of things that you would like to achieve or to spend more time doing, and the kind of person that you want to be. | Seems to think that everyone wants to get the same from life (NEUTRAL)<br>Works with you on what you want to get from life (HIGH) |
| Communication   | By “communication” we mean the way that the support service might communicate with you                                                                                                                                   | Communicates with you in a neutral professional way (NEUTRAL)<br>Communicates with you in a friendly and personal way (HIGH)      |
| Cost            | Please assume that each support service will be provided once a week for six weeks                                                                                                                                       | Costs £5 per week<br>Costs £10 per week<br>Costs £15 per week<br>Costs £20 per week                                               |

<sup>1</sup> Or breathlessness, depending on sample

Table 2 Participant characteristics

| Discrete choice experiment      |                            | Chronic Pain (DCE1)<br>N=517 |    | Breathlessness (DCE2)<br>N=200 |     | Chronic Pain (DCE3)<br>N=206 |    |
|---------------------------------|----------------------------|------------------------------|----|--------------------------------|-----|------------------------------|----|
|                                 |                            |                              | %  |                                | %   |                              | %  |
| <b>Gender</b>                   | Male                       | 176                          | 34 | 86                             | 43  | 99                           | 48 |
|                                 | Female                     | 341                          | 66 | 114                            | 57  | 107                          | 52 |
| <b>Age</b>                      | < 40 years                 | 61                           | 12 | 42                             | 21  | 23                           | 11 |
|                                 | 40-49 years                | 92                           | 18 | 43                             | 22  | 31                           | 15 |
|                                 | 50-59 years                | 129                          | 25 | 48                             | 24  | 62                           | 30 |
|                                 | 60-69 years                | 157                          | 30 | 43                             | 22  | 79                           | 38 |
|                                 | ≥ 70 years                 | 78                           | 15 | 24                             | 12  | 16                           | 8  |
| <b>Marital status</b>           | Single                     | 86                           | 17 | 25                             | 13  | 30                           | 15 |
|                                 | Married/ legal partnership | 333                          | 64 | 137                            | 69  | 142                          | 69 |
|                                 | Separated/Widowed          | 98                           | 19 | 38                             | 19  | 34                           | 17 |
| <b>Education</b>                | No formal qualifications   | 32                           | 6  | 15                             | 8   | 12                           | 6  |
|                                 | Secondary/high school      | 243                          | 47 | 87                             | 44  | 90                           | 45 |
|                                 | University/College degree  | 220                          | 43 | 89                             | 45  | 91                           | 46 |
|                                 | Other                      | 22                           | 4  | 9                              | 4.5 | 13                           | 7  |
| <b>Household income</b>         | ≤£10,399/year              | 64                           | 12 | 21                             | 11  | 26                           | 13 |
|                                 | £10,400-20,799/year        | 140                          | 27 | 36                             | 18  | 46                           | 22 |
|                                 | £20,800-36,399/year        | 158                          | 31 | 33                             | 17  | 63                           | 31 |
|                                 | £36,400-51,999/year        | 61                           | 12 | 62                             | 31  | 30                           | 15 |
|                                 | ≥£1000/week (≥£52000)      | 40                           | 8  | 32                             | 16  | 21                           | 10 |
|                                 | Prefer not to say          | 54                           | 10 | 16                             | 8   | 20                           | 10 |
| <b>Employment</b>               | Employed/working           | 182                          | 35 | 97                             | 49  | 77                           | 37 |
|                                 | Retired                    | 198                          | 38 | 55                             | 28  | 66                           | 32 |
|                                 | Long-term sick or disabled | 70                           | 14 | 13                             | 7   | 48                           | 23 |
|                                 | Other not employed         | 67                           | 13 | 35                             | 18  | 15                           | 7  |
| <b>Self-rated health status</b> | Very good                  | 21                           | 4  | 10                             | 5   | 4                            | 2  |
|                                 | Good                       | 154                          | 30 | 62                             | 31  | 46                           | 22 |
|                                 | Fair                       | 226                          | 44 | 88                             | 44  | 90                           | 44 |
|                                 | Bad                        | 97                           | 19 | 37                             | 19  | 53                           | 26 |
|                                 | Very bad                   | 19                           | 4  | 3                              | 2   | 13                           | 6  |

Table 3 Tests for risk of low quality DCE data

| Discrete Choice Experiment                          | Chronic Pain (DCE1) |       | Breathlessness (DCE2) |       | Chronic Pain (DCE3) |       | Overall |       |
|-----------------------------------------------------|---------------------|-------|-----------------------|-------|---------------------|-------|---------|-------|
|                                                     | N=517               |       | N=200                 |       | N=206               |       | N=923   |       |
| <b>Incidence of individual low-quality criteria</b> |                     |       |                       |       |                     |       |         |       |
| Serial non-participation                            | 7                   | 1.4%  | 5                     | 2.5%  | 5                   | 2.4%  | 17      | 1.8%  |
| Dominance                                           | 56                  | 10.8% | 28                    | 14.0% | 31                  | 15.0% | 115     | 12.5% |
| Response time                                       | 74                  | 14.3% | 33                    | 16.5% | 28                  | 13.6% | 135     | 14.6% |
| <b>Cumulative tests failed per individual</b>       |                     |       |                       |       |                     |       |         |       |
| One or more test failed                             | 115                 | 22.2% | 53                    | 26.1% | 44                  | 21.4% | 209     | 22.6% |
| Two or more tests failed                            | 19                  | 3.7%  | 17                    | 8.4%  | 16                  | 7.8%  | 49      | 5.3%  |
| All three tests failed                              | 3                   | 0.6%  | 5                     | 2.5%  | 4                   | 1.9%  | 12      | 1.3%  |

**Table 4 Multinomial Logit Analysis: higher vs neutral level of person-centredness by attribute and by Discrete Choice Experiment**

| Discrete Choice Experiment      | Chronic Pain (DCE1) |                  | Breathlessness (DCE2) |                  | Chronic Pain (DCE3) |                |
|---------------------------------|---------------------|------------------|-----------------------|------------------|---------------------|----------------|
|                                 | Estimate            | 95% CI           | Estimate              | 95% CI           | Estimate            | 95% CI         |
| <b>Regression coefficient</b>   |                     |                  |                       |                  |                     |                |
| Information                     | 0.65                | (0.58 to 0.73)   | 0.60                  | (0.47 to 0.72)   | 0.93                | (0.79 to 1.07) |
| Situation                       | 0.91                | (0.82 to 0.99)   | 0.90                  | (0.76 to 1.05)   | 1.43                | (1.23 to 1.63) |
| Living well                     | 0.85                | (0.78 to 0.92)   | 0.81                  | (0.68 to 0.93)   | 1.19                | (1.04 to 1.35) |
| Communication                   | 0.21                | (0.15 to 0.26)   | 0.21                  | (0.12 to 0.30)   | 0.31                | (0.20 to 0.42) |
| Cost <sup>2</sup>               | -0.06               | (-0.07 to -0.05) | -0.06                 | (-0.07 to -0.04) | -                   | -              |
| <b>Choice Elasticity (in %)</b> |                     |                  |                       |                  |                     |                |
| Information                     | 12.3                | (11.0 to 13.6)   | 10.6                  | (8.3 to 12.9)    | 15.0                | (12.9 to 17.0) |
| Situation                       | 16.9                | (15.4 to 18.3)   | 16.1                  | (13.6 to 18.6)   | 21.9                | (19.3 to 24.5) |
| Living well                     | 15.8                | (14.5 to 17.1)   | 14.6                  | (12.5 to 16.7)   | 19.4                | (17.2 to 21.6) |
| Communication                   | 3.8                 | (2.7 to 4.8)     | 4.2                   | (2.6 to 5.8)     | 5.4                 | (3.5 to 7.2)   |
| Cost                            | -1.1                | (-1.2 to -0.9)   | -1.0                  | (-1.3 to -0.8)   |                     |                |
| <b>Model statistics</b>         |                     |                  |                       |                  |                     |                |
| Individuals                     | 517                 |                  | 200                   |                  | 206                 |                |
| Observations                    | 12408               |                  | 4800                  |                  | 4944                |                |
| Parameters                      | 5                   |                  | 5                     |                  | 4                   |                |
| Log Likelihood                  | -12004              |                  | -4739                 |                  | -4542               |                |
| BIC                             | 24054               |                  | 9520                  |                  | 9117                |                |

<sup>2</sup> Coefficient for increase by £1 in cost of service

BIC: Bayesian Information Criterion

Table 5 Coefficients for preferences and class membership for 4 groups from Latent Class Logit modelling (data pooled from patients in DCE1 and DCE2)

| Latent Class                             | Class 1 – Situation / Living Well |                       | Class 2 - Information |                       | Class 3 – Cost dominant |                         | Class 4 - inconsistent |                         |
|------------------------------------------|-----------------------------------|-----------------------|-----------------------|-----------------------|-------------------------|-------------------------|------------------------|-------------------------|
|                                          | Coefficient.                      | 95% ci                | Coefficient.          | 95% ci                | Coefficient             | 95% ci                  | Coefficient            | 95% ci                  |
| <b>Preferences<sup>1</sup></b>           |                                   |                       |                       |                       |                         |                         |                        |                         |
| Information                              | 0.80                              | (0.72 to 0.88)        | <b>1.95</b>           | <b>(1.78 to 2.13)</b> | 0.24                    | (0.14 to 0.35)          | 0.01                   | (-0.07 to 0.10)         |
| Situation                                | <b>2.08</b>                       | <b>(1.95 to 2.21)</b> | 0.98                  | (0.84 to 1.12)        | 0.31                    | (0.18 to 0.44)          | 0.18                   | (0.08 to 0.28)          |
| Living well                              | <b>1.82</b>                       | <b>(1.70 to 1.94)</b> | 0.78                  | (0.65 to 0.90)        | 0.44                    | (0.32 to 0.55)          | 0.25                   | (0.16 to 0.33)          |
| Communication                            | 0.45                              | (0.37 to 0.52)        | 0.23                  | (0.10 to 0.36)        | 0.11                    | (0.01 to 0.21)          | 0.11                   | (0.03 to 0.20)          |
| Cost                                     | -0.06                             | (-0.07 to -0.06)      | -0.05                 | (-0.06 to -0.04)      | <b>-0.25</b>            | <b>(-0.27 to -0.23)</b> | 0.02                   | (0.01 to 0.02)          |
| <b>Class membership<sup>2</sup></b>      |                                   |                       |                       |                       |                         |                         |                        |                         |
| Constant                                 | -                                 | -                     | -0.77                 | (-1.71 to 0.17)       | 1.00                    | (0.15 to 1.85)          | 0.45                   | (-0.38 to 1.27)         |
| DCE2 <sup>3</sup>                        | -                                 | -                     | -0.21                 | (-0.75 to 0.32)       | -0.02                   | (-0.53 to 0.49)         | 0.07                   | (-0.40 to 0.54)         |
| Relationship: Single <sup>4</sup>        | -                                 | -                     | -0.16                 | (-0.69 to 0.36)       | -0.37                   | (-0.89 to 0.15)         | -0.10                  | (-0.58 to 0.39)         |
| Education: University <sup>5</sup>       | -                                 | -                     | 0.20                  | (-0.29 to 0.69)       | -0.05                   | (-0.54 to 0.43)         | 0.01                   | (-0.44 to 0.46)         |
| Job status: Not working <sup>6</sup>     | -                                 | -                     | -0.18                 | (-0.97 to 0.62)       | -0.08                   | (-0.82 to 0.67)         | -0.30                  | (-1.02 to 0.41)         |
| Job status: Retired <sup>6</sup>         | -                                 | -                     | -0.15                 | (-0.72 to 0.43)       | <b>-0.59</b>            | <b>(-1.17 to -0.01)</b> | <b>-0.81</b>           | <b>(-1.36 to -0.27)</b> |
| Job status: Disabled <sup>6</sup>        | -                                 | -                     | 0.31                  | (-0.67 to 1.29)       | 0.08                    | (-0.82 to 0.99)         | -0.15                  | (-1.00 to 0.70)         |
| Perceived health: Fair <sup>7</sup>      | -                                 | -                     | -0.05                 | (-0.59 to 0.49)       | -0.44                   | (-0.96 to 0.08)         | -0.09                  | (-0.59 to 0.41)         |
| Perceived health: Poor <sup>7</sup>      | -                                 | -                     | -0.58                 | (-1.33 to 0.16)       | <b>-1.06</b>            | <b>(-1.78 to -0.34)</b> | -0.45                  | (-1.11 to 0.21)         |
| Gender: Female <sup>8</sup>              | -                                 | -                     | -0.10                 | (-0.61 to 0.42)       | <b>-0.82</b>            | <b>(-1.31 to -0.33)</b> | <b>-0.62</b>           | <b>(-1.08 to -0.16)</b> |
| Income: £15600-£31199 <sup>9</sup>       | -                                 | -                     | 0.24                  | (-0.46 to 0.95)       | -0.61                   | (-1.22 to 0.01)         | -0.10                  | (-0.70 to 0.50)         |
| Income: £31200+ <sup>9</sup>             | -                                 | -                     | 0.40                  | (-0.34 to 1.15)       | <b>-1.15</b>            | <b>(-1.88 to -0.43)</b> | -0.12                  | (-0.78 to 0.53)         |
| Income: Not prepared to say <sup>9</sup> |                                   |                       | <b>0.93</b>           | <b>(0.08 to 1.78)</b> | -0.19                   | (-1.02 to 0.64)         | -0.13                  | (-1.03 to 0.78)         |
| <b>Class share</b>                       | N                                 | %                     | N                     | %                     | N                       | %                       | N                      | %                       |
| Predicted membership                     | 286                               | 39.9%                 | 137                   | 19.1%                 | 126                     | 17.6%                   | 168                    | 23.4%                   |
| <b>Data quality<sup>1</sup></b>          |                                   |                       |                       |                       |                         |                         |                        |                         |
| Serial Non Participation (N=12)          | 0                                 | -                     | 0                     | -                     | 0                       | -                       | <b>12</b>              | <b>100%</b>             |
| Dominance (N=84)                         | 11                                | 13.1%                 | 6                     | 7.1%                  | 2                       | 2.4%                    | <b>65</b>              | <b>77.4%</b>            |
| Response time (N=107)                    | 4                                 | 3.7%                  | 9                     | 8.4%                  | <b>46</b>               | <b>43.0%</b>            | <b>48</b>              | <b>44.9%</b>            |

1  
2  
3  
4  
5  
6  
7  
8  
9  
10  
11  
12  
13  
14  
15  
16  
17  
18  
19  
20  
21  
22  
23  
24  
25  
26  
27  
28  
29  
30  
31  
32  
33  
34  
35  
36  
37  
38  
39  
40  
41  
42  
43  
44  
45  
46  
47  
48  
49

<sup>1</sup> In the Preferences and Data quality sections, only the dominant values are highlighted in **bold**; <sup>2</sup> in the Class membership section, statistically significant coefficients are highlighted in **bold**; <sup>3</sup> compared to DCE1; <sup>4</sup> Compared to married /co-habiting; <sup>5</sup> compared to no university education; <sup>6</sup> compared to working; <sup>7</sup> “bad” or “very bad” self-rated health compared to “good” or “very good”. <sup>8</sup> compared to male; <sup>9</sup> compared to <£15600 per annum

For peer review only

Figure 1: Simplified illustration of mapping of different sources to final attributes

For peer review only

1  
2  
3  
4  
5  
6  
7  
8  
9  
10  
11  
12  
13  
14  
15  
16  
17  
18  
19  
20  
21  
22  
23  
24  
25  
26  
27  
28  
29  
30  
31  
32  
33  
34  
35  
36  
37  
38  
39  
40  
41  
42  
43  
44  
45  
46  
47  
48  
49  
50  
51  
52  
53  
54  
55  
56  
57  
58  
59  
60

For peer review only



1  
2  
3  
4  
5  
6  
7  
8  
9  
10  
11  
12  
13  
14  
15  
16  
17  
18  
19  
20  
21  
22  
23  
24  
25  
26  
27  
28  
29  
30  
31  
32  
33  
34  
35  
36  
37  
38  
39  
40  
41  
42  
43  
44  
45  
46  
47  
48  
49  
50  
51  
52  
53  
54  
55  
56  
57  
58  
59  
60

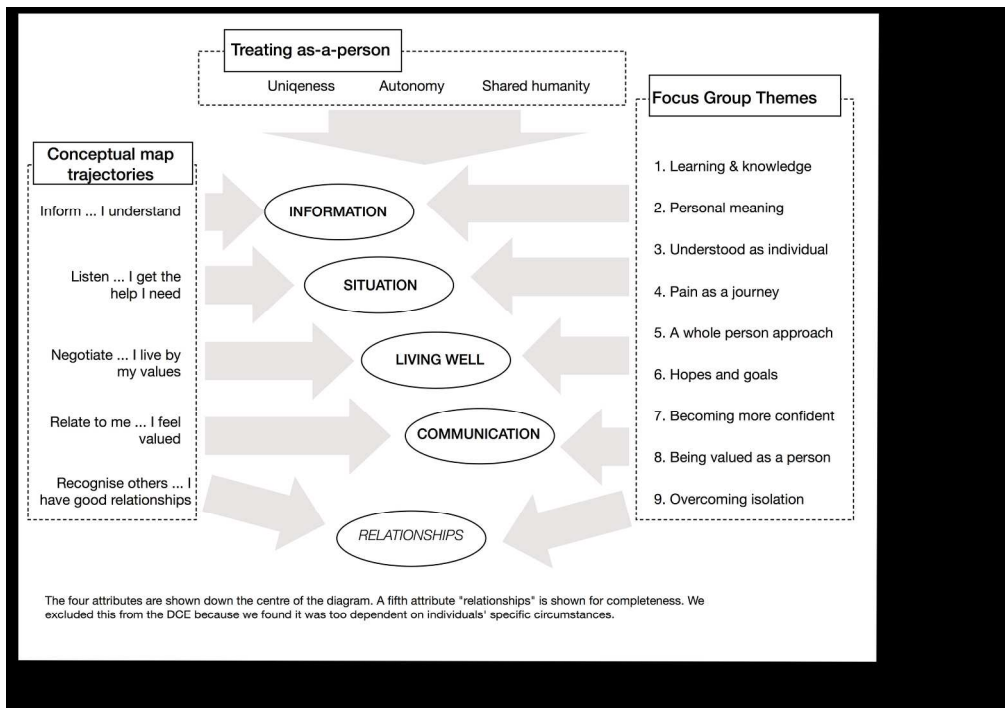

Figure 1: Simplified illustration of mapping of different sources to final attributes

210x148mm (300 x 300 DPI)

Review only

# Supplementary Methods

## Tests of data quality

### Overview

We analysed the risk of individuals submitting low quality data in three ways First we included a simple dominance test to check for irrational responses. Second, we identified participants who exhibited a systematic choice pattern, e.g. systematically selecting the 1st option as “most preferred”. Third, we analysed the response time for each choice task, allowing identification of participants whose responses to the choices were either much quicker (possibly representing “clicking through” choices rather than stopping to consider) or slower (possibly indicating either difficulty comprehending the choices or distraction by other activities).

### Dominance

In addition to the 12 choice tasks, each DCE included two additional tasks: a “warm-up” choice task and a “dominance” test. The former was used to familiarise participants with the format of the choice questions and act as a transition between the instructions and first live choice task. The dominance task was the last task faced by the participants and included three options: A) all attributes set at their “best” levels (high level of personalisation with lowest level of cost); B) all attributes set at their “worst” levels (neutral personalisation with highest level of cost); and C) an intermediate option. Participants were expected to choose rationally, thus alternative A as “most preferred” and alternative B as “least preferred”. An example choice task is shown in Web Appendix A. Dominance: A respondent was considered as failing dominance test when she/he selected an irrational, “wrong”, alternative for both best and worst choice.

### Systematic choice bias

We measured serial non participation (SNP), the systematic choice based on some criterion other than the content of the attributes in relation to choice order. A respondent was considered as a serial non participant when at least 75% of his/her choices were on the same choice position (e.g. first presented, last presented) for at least one type of decision (either Best or Worst)

### Response time

For each choice task we computed the 1st quintile (20%), the median (50%) and the 4th quintile (80%) of response time (RT). We then used a bootstrapping procedure with 1000 replications to obtain the 95% confidence interval (CI) around the {20%; 50%; 80%} measures. A response time was classified as a fast outlier when its duration was shorter than the lower bound of the 95% confidence intervals for the 1st RT quintile or classified as a slow outlier when its duration was longer than the upper bound of the 95% confidence intervals of the 4th RT quintile. A respondent was considered as an outlier when either  $\geq 50\%$  of response times to decision tasks (i.e. both best and worst decisions for each choice task) were fast outliers, or  $\geq 50\%$  of response times to decision tasks were slow outliers.

# Supplementary Results

**Table S1 Additional Self-reported characteristics of participants**

|                                   |                    | Chronic Pain |    | Breathlessness |    | Chronic Pain (no cost) |    |
|-----------------------------------|--------------------|--------------|----|----------------|----|------------------------|----|
|                                   |                    | N=517        |    | N=200          |    | N=206                  |    |
|                                   |                    |              | %  |                | %  |                        | %  |
| <b>Chronic Pain Grade</b>         | Grade 0            | 0            | 0  | -              | -  | 0                      | 0  |
|                                   | Grade I            | 80           | 16 | -              | -  | 16                     | 8  |
|                                   | Grade II           | 170          | 33 | -              | -  | 58                     | 28 |
|                                   | Grade III          | 114          | 22 | -              | -  | 52                     | 25 |
|                                   | Grade IV           | 153          | 30 | -              | -  | 80                     | 39 |
| <b>COPD Control Questionnaire</b> | Minimal (< 1)      | -            | -  | 43             | 22 | -                      | -  |
|                                   | Mild (1-1.9)       | -            | -  | 53             | 26 | -                      | -  |
|                                   | Moderate (2-2.9)   | -            | -  | 45             | 22 | -                      | -  |
|                                   | Severe (≥3)        | -            | -  | 59             | 30 | -                      | -  |
| <b>Years of chronic pain</b>      | Less than 1 year   | 58           | 11 | -              | -  | 26                     | 13 |
|                                   | 1- 5 years         | 213          | 41 | -              | -  | 46                     | 22 |
|                                   | 6-10 years         | 107          | 21 | -              | -  | 63                     | 31 |
|                                   | More than 10 years | 139          | 27 | -              | -  | 30                     | 15 |

**Table S3: Regression coefficients, with 95% confidence intervals, for higher vs neutral level of personalisation of attributes from multinomial logit models, for each DCE, after exclusion of participants who failed two or more data quality tests.**

| Attribute                     | Chronic Pain |                | Breathlessness |                | Chronic Pain (no cost) |              |
|-------------------------------|--------------|----------------|----------------|----------------|------------------------|--------------|
|                               | Estimate     | 95% CI         | Estimate       | 95% CI         | Estimate               | 95% CI       |
| <b>Regression coefficient</b> |              |                |                |                |                        |              |
| Information                   | 0.65         | 0.61 to 0.69   | 0.59           | 0.52 to 0.66   | 0.87                   | 0.80 to 0.95 |
| Situation                     | 0.91         | 0.86 to 0.96   | 0.88           | 0.80 to 0.96   | 1.33                   | 1.24 to 1.42 |
| Living well                   | 0.86         | 0.81 to 0.90   | 0.79           | 0.72 to 0.87   | 1.16                   | 1.08 to 1.24 |
| Communication                 | 0.21         | 0.17 to 0.26   | 0.21           | 0.14 to 0.27   | 0.32                   | 0.25 to 0.38 |
| Cost <sup>1</sup>             | -0.06        | -0.06 to -0.06 | -0.06          | -0.06 to -0.05 | -                      | -            |
| <b>Model statistics</b>       |              |                |                |                |                        |              |
| Individuals                   | 498          |                | 186            |                | 190                    |              |
| Observations                  | 11952        |                | 4464           |                | 4560                   |              |
| Parameters                    | 5            |                | 5              |                | 4                      |              |
| Log Likelihood                | -11428       |                | -4330          |                | -4039                  |              |

<sup>1</sup> Coefficient for increase by £1 in cost of service  
BIC: Bayesian Information Criterion

1  
2  
3  
4  
5  
6  
7  
8  
9  
10  
11  
12  
13  
14  
15  
16  
17  
18  
19  
20  
21  
22  
23  
24  
25  
26  
27  
28  
29  
30  
31  
32  
33  
34  
35  
36  
37  
38  
39  
40  
41  
42  
43  
44  
45  
46  
47  
48  
49  
50  
51  
52  
53  
54  
55  
56  
57  
58  
59  
60

QUESTION 5

What kind of support service would you like to use? Each support service would be provided once a week for six weeks. Which would you like the least and which would you like the most?

**Service A**

- Provides information that is relevant to you
- Makes suggestions that fit your current situation
- Helps you focus on what you want to get from life
- Communicates with you in a neutral professional way
- Costs £10 per week

**Service B**

- Provides information that is relevant to you
- Takes little account of your current situation
- Helps you focus on what you want to get from life
- Communicates with you in a friendly and personal way
- Costs £5 per week

**Service C**

- Provides everyone with the same information
- Takes little account of your current situation
- Seems to think that everyone wants to get the same from life
- Communicates with you in a neutral professional way
- Costs £20 per week

1. Which service would you like the **least**?

Service A       Service B       Service C

2. Which service would you like the **most**?

Service A       Service B       Service C

297x420mm (300 x 300 DPI)

# BMJ Open

## The value of different aspects of person-centred care: a series of discrete choice experiments in people with long-term conditions

|                                 |                                                                                                                                                                                                                                                                                                                                                                                                                                          |
|---------------------------------|------------------------------------------------------------------------------------------------------------------------------------------------------------------------------------------------------------------------------------------------------------------------------------------------------------------------------------------------------------------------------------------------------------------------------------------|
| Journal:                        | <i>BMJ Open</i>                                                                                                                                                                                                                                                                                                                                                                                                                          |
| Manuscript ID                   | bmjopen-2016-015689.R2                                                                                                                                                                                                                                                                                                                                                                                                                   |
| Article Type:                   | Research                                                                                                                                                                                                                                                                                                                                                                                                                                 |
| Date Submitted by the Author:   | 14-Mar-2017                                                                                                                                                                                                                                                                                                                                                                                                                              |
| Complete List of Authors:       | Burton, Christopher; University of Sheffield, Academic Unit of Primary Medical Care<br>Entwistle, Vikki; University of Aberdeen, HSRU<br>Elliott, Alison; University of Aberdeen, Institute of Applied Health Sciences<br>Krucien, Nicolas; Univ Aberdeen, Health Economic Research Unit<br>Porteous, Terry; University of Aberdeen, Health Services Research Unit<br>Ryan, Mandy; University of Aberdeen, Health Economic Research Unit |
| <b>Primary Subject Heading</b>: | Patient-centred medicine                                                                                                                                                                                                                                                                                                                                                                                                                 |
| Secondary Subject Heading:      | Health economics, Health services research                                                                                                                                                                                                                                                                                                                                                                                               |
| Keywords:                       | Quality in health care < HEALTH SERVICES ADMINISTRATION & MANAGEMENT, Self management, person centred care, patient centered care, discrete choice experiment                                                                                                                                                                                                                                                                            |
|                                 |                                                                                                                                                                                                                                                                                                                                                                                                                                          |

SCHOLARONE™  
Manuscripts

Only

1  
2  
3 The value of different aspects of person-centred care: a series of discrete choice experiments in  
4 people with long-term conditions.  
5  
6  
7

8  
9 Authors  
10

11  
12  
13 Christopher Burton, Professor of Primary Care<sup>1</sup>  
14

15 Vikki A Entwistle, Professor of Health Services Research<sup>2</sup>  
16

17 Alison M Elliott, Senior Research Fellow in Primary Care<sup>3</sup>  
18

19 Nicolas Krucien, Research Fellow in Health Economics<sup>4</sup>  
20

21 Terry Porteous, Research Fellow in Health Services Research<sup>2</sup>  
22

23 Mandy Ryan, Professor of Health Economics<sup>4</sup>  
24  
25  
26  
27

- 28  
29 1. Academic Unit of Primary Medical Care, University of Sheffield  
30 2. Health Services Research Unit, University of Aberdeen  
31  
32 3. Institute of Applied Health Sciences, University of Aberdeen  
33  
34 4. Health Economic Research Unit, University of Aberdeen  
35  
36  
37

38 Corresponding author  
39

40 Christopher Burton

41 Academic Unit of Primary Medical Care

42 University of Sheffield

43 Samuel Fox House, Northern General Hospital

44 Sheffield S5 7AU  
45  
46

47 Email [chris.burton@sheffield.ac.uk](mailto:chris.burton@sheffield.ac.uk)

48 Phone +44 (0)1114 222 2216  
49  
50  
51  
52  
53  
54  
55  
56  
57  
58  
59  
60



1  
2  
3 ABSTRACT  
4  
5

6 Objective: To measure the value patients place on different aspects of person-centred care.  
7

8  
9 Design: We systematically identified four attributes of person-centred care. We then measured their  
10 value to 923 people with either chronic pain or chronic lung disease over three discrete choice  
11 experiments (DCEs) about services to support self-management. We calculated the value of each  
12 attribute for all respondents, and identified groups of people with similar preferences using latent  
13 class modelling.  
14  
15  
16  
17  
18  
19

20  
21 Setting: DCEs conducted online via a commercial survey company.  
22  
23

24 Participants: Adults with either chronic pain (two DCEs, N= 517 and 206 respectively) or  
25 breathlessness due to chronic respiratory disease (N=200).  
26  
27  
28

29 Results: Participants were more likely to choose services with higher level person-centred attributes.  
30 They most valued services that took account of a person's current situation (likelihood of selection  
31 increased by 16.9%; 95%CI 15.4 to 18.3) and worked with the person on what they wanted to get  
32 from life (15.8%; 14.5 to 17.1). More personally relevant information was valued less than these  
33 (12.3%; 11.0 to 13.6). A friendly and personal communicative style was valued least (3.8%; 2.7 to  
34 4.8). Latent class models indicated that a substantial minority of participants valued personally  
35 relevant information over the other attributes.  
36  
37  
38  
39  
40  
41  
42  
43  
44

45 Conclusion: This is the first study to measure the value patients place on different aspects of person-  
46 centred care. Professional training needs to emphasise the substance of clinical communication –  
47 working responsively with individuals on what matters to them – as well as the style of its delivery.  
48  
49  
50  
51  
52  
53  
54  
55  
56  
57  
58  
59  
60

## Article Summary

### Strengths and limitations of this study

- This is the first study to quantify the value which patients place on different aspects of person-centredness.
- Person-centred care is a complex concept: we designed the attributes for the discrete choice experiments using a rigorous process involving both theoretical and empirical work followed by two cycles of development and testing.
- Despite this, the study was limited to four attributes of person-centredness which inevitably cannot encompass the full richness of this concept.
- We conducted three experiments, each with a version of the same core discrete choice experiment, to reduce the risk that our results were biased by our choice of methods or population and to increase generalisability.
- The experiments were sufficiently powered to identify and characterise sub-groups of patients with similar patterns of values.

## INTRODUCTION

Person-centred care is key to high quality healthcare [1]. Person-centred care, along with its near-synonym patient-centred care, is a complex concept that has been analysed and operationalized in a number of overlapping ways for different contexts and purposes [1-7]. One widely used definition summarises it as “respectful and responsive to individual patient preferences, needs, and values, and ensuring that patient values guide all clinical decisions” [4]. More theoretical analyses start from a consideration of patients as persons and what this means for how health services and staff should (ethically) relate to them [2,5]. Although they use a variety of terms, they tend to emphasise the importance of: recognising and taking into account each patients’ subjective experiences of health problems and healthcare, including how these fit into their personal biography or narrative, and impact their self-identity; working with sensitivity to each patient’s particular situation, including their social relationships and material circumstances; and respecting and relating to each patient as a moral agent, for example by sharing decision-making rather than imposing decisions about potential healthcare interventions [2-7].

From a patient’s perspective, person centred care can depend, among other things, on practitioners adopting an appropriate communication style, providing personally relevant information, taking appropriate account of their personal circumstances, and working with them on what matters to them ( or what they want to get from life) [8, 9]. Of these, communication style is perhaps most often addressed in health professional training, although an emphasis on communication skills rather than deeper interpersonal attitudes and value commitments has been criticised [10, 11]. No studies have quantified how much different aspects of person-centred care matter to patients.

Alongside the emphasis on person-centred care, there is a drive to support people with long-term conditions to “self-manage” [12, 13]. Recent critiques of health services’ support for self-management have suggested that it is often delivered in ways that fall short of aspirations for person-centred care [14]. First, services often rely on a “one-size-fits-all” approach, although people

1  
2  
3 have diverse capabilities and needs for support [15]. Second, interventions and approaches are often  
4  
5 influenced by professionals' biomedical perspectives [16] rather than what people value for living  
6  
7 well with their conditions [16]. Third, while much self-management support focuses on providing  
8  
9 individuals with knowledge, skills and motivation, the barriers to effective self-management  
10  
11 commonly lie in people's broader social and material environments [17-20]. Support for self-  
12  
13 management thus provides an important context for the study of person-centred care.  
14

15  
16 We aimed to measure what matters to patients in relation to person-centred care by conducting a  
17  
18 series of discrete choice experiments about services to support self-management for people with  
19  
20 long term conditions. We hypothesised that individuals would vary in how much they valued  
21  
22 different aspects of person-centred care but did not specify a magnitude of difference or specify that  
23  
24 any particular attribute would be consistently more highly valued.  
25  
26  
27  
28  
29  
30  
31

## 32 **METHODS**

33 Discrete choice experiments (DCEs) enable researchers to measure individuals' preferences by  
34  
35 calculating the value they place on particular attributes [21]. They involve participants completing a  
36  
37 set of hypothetical choice tasks, each of which involves choosing between two or more alternatives.  
38  
39 The alternatives are described in terms of multiple attributes, with levels which are systematically  
40  
41 varied across the choice tasks. Participants' responses are analysed to measure the influence of the  
42  
43 different levels of attributes on choices.  
44  
45

46  
47 We designed and used DCEs in three linked studies, two among people with chronic pain and one  
48  
49 among people with breathlessness due to chronic respiratory disease. Both conditions are common  
50  
51 and directly affect individuals through current symptoms. Self-management of these conditions  
52  
53 requires adaptation to the limitations caused by the condition [16], but does not include technical  
54  
55 tasks such as monitoring blood tests or treatment. Each of the three DCEs used the same attribute  
56  
57  
58  
59  
60

1  
2  
3 levels and set of choice tasks, with minor contextual changes to the wording. The second chronic  
4  
5 pain DCE was similar to the first except that we excluded any reference to the cost of a service, to  
6  
7 avoid potential bias of results due to cost.  
8  
9

### 10 **Development of the DCE**

11  
12 DCEs typically include attributes and levels which describe the process of care, and are easily defined  
13  
14 (e.g. consulting a doctor versus seeing a nurse) or easily quantified (e.g. waiting for different lengths  
15  
16 of times). In this study we sought to value attributes which describe the nature of care – its person-  
17  
18 centredness - which is less easily defined in single statements or which may be interpreted in  
19  
20 different ways [22]. To address this challenge and ensure that the DCE was valid and reliable, we  
21  
22 followed best practice to design, develop and test the DCE through three stages: attribute selection;  
23  
24 attribute testing and development; and pilot survey. To do this, we drew on recent theoretical [15]  
25  
26 and empirical research [8], and conducted focus group discussions and think-aloud interviews [23] in  
27  
28 which participants talked through their responses to draft versions of the DCE. As there were far  
29  
30 more possible combinations of attributes and levels than we could test, we designed the DCE to  
31  
32 provide maximal statistical efficiency for a manageable length of questionnaire by applying D-  
33  
34 Efficient design with a Bayesian approach [24]. This involved conducting a preliminary DCE with 117  
35  
36 participants in order to develop a “well-informed” experimental design for the main study.  
37  
38  
39  
40

#### 41 *Attribute selection*

42  
43 We began the process of attribute selection from three starting points. First was the idea that the  
44  
45 overall aim of support for self-management is to enable people “to live well with long-term  
46  
47 conditions” [15]. Second, we used the notion that person-centredness is primarily a matter of  
48  
49 treating everyone “as a person” [2]. Treating someone as a person includes recognising and  
50  
51 responding to their individual characteristics and preferences. It also includes respecting them as a  
52  
53 fellow human, recognition of their unique biography and identity, and support for their autonomy to  
54  
55 shape and live their lives according to their own values rather than those of others. Third, we used a  
56  
57  
58  
59  
60

1  
2  
3 conceptual map of what matters to patients about how healthcare is delivered [8] which considers  
4  
5 items in three categories: “*what health services are like and do*”, “*how they relate to me*” and “*what*  
6  
7 *they enable me to do*”.

8  
9  
10 We explored these, and other, ideas around person-centredness in relation to support for self-  
11  
12 management in six focus groups, each comprising between 5 and 7 individuals. Three groups  
13  
14 involved people with chronic pain (members of two peer support groups and individuals recruited  
15  
16 through a pain clinic), two groups involved non-clinical providers of support for self-management of  
17  
18 long-term conditions, and one group came from a multidisciplinary pain team (to provide  
19  
20 professional triangulation of the patient perspective). Groups lasted between 40 and 65 minutes and  
21  
22 began by open discussion, following a topic guide, about ways in which support for self-management  
23  
24 may be made personal. Later in the groups, we presented 6 provisional attributes of person-  
25  
26 centredness, each with 2 or 3 levels, for discussion. Focus groups were audio-recorded, transcribed  
27  
28 and analysed thematically. In conducting and analysing the focus groups we did not aim for  
29  
30 exhaustive recruitment, or in-depth qualitative analysis. Rather the focus groups were used as  
31  
32 sources of contextual and confirmatory (or disconfirming) data, to be used - alongside our own and  
33  
34 others’ conceptual work and empirical evidence – in developing the attributes and levels of the DCE.  
35  
36  
37  
38  
39 In the attribute selection phase we recognised that the data from these different sources overlapped  
40  
41 in various ways. For the DCE design, however, we needed a manageable number of well  
42  
43 differentiated (ideally potentially independent) attributes that described (aspects of) person-  
44  
45 centredness from a patient’s perspective. We chose to focus on four aspects of person-centredness,  
46  
47 summarised as information, situation, living well and communicative style. A simplified view of the  
48  
49 relationship between these aspects and the developmental sources is shown in Figure 1.  
50  
51

### 52 53 *Attribute development and testing*

54  
55 We carried out two cycles of development and testing of attributes and their associated levels. Each  
56  
57 cycle comprised three stages: drafting of attribute-level statements, cognitive testing of these  
58  
59  
60

1  
2  
3 statements using think-aloud interviews [23], and evaluation of the think-aloud results. Statements  
4  
5 were drafted and revised by all members of the research team in order that they would be broadly  
6  
7 applicable and easily and consistently understood. We conducted think-aloud interviews with a total  
8  
9 of 17 people with chronic pain, 6 of whom had participated in the focus groups; ten took part in the  
10  
11 first cycle and seven in the second. During the think-aloud interviews, participants completed a  
12  
13 paper-based version of the DCE using the current attributes and were asked to describe their  
14  
15 thoughts about the attributes and levels, and their decisions, as they did so. Think-aloud interviews  
16  
17 were audio-recorded, transcribed and analysed to identify areas for clarification. Evaluation at the  
18  
19 end of the first cycle led to revision of attribute-level statements to be used in the second cycle. In  
20  
21 particular, we found that respondents experienced problems when three levels were assigned to  
22  
23 each attribute. If these were neutral, high and very high, some people found the very high level  
24  
25 excessive, and there was some variation in how people interpreted which of the two higher levels  
26  
27 was better. However if the levels were low (i.e. actively not person-centred) neutral and high, people  
28  
29 made choices to avoid the low rather than choose between the two higher attributes. As we were  
30  
31 interested in how people positively valued more person-centred care, rather than their negative  
32  
33 valuing of impersonal care, we limited the levels for each attribute to two, designed to represent:  
34  
35 neutral and high person-centredness.  
36  
37  
38  
39

#### 40 *Final attribute wording*

41  
42 The four final person-centredness attributes and their levels are listed in box 1. The attributes were  
43  
44 presented in relation to services to support self-management for chronic pain (DCEs 1 & 3) and  
45  
46 chronic lung disease (DCE 2). In addition to the four person-centredness attributes, we also included  
47  
48 a cost attribute in DCEs 1 and 2, presented as the cost per week for a 6-week programme. This had  
49  
50 four levels ranging from £5 to £20 per week. We included the cost attribute in order to be able to  
51  
52 estimate willingness to pay, a monetary measure of benefit . To address a concern that the inclusion  
53  
54 of cost might bias the results (in the UK the NHS does not charge patients for treatment at the point  
55  
56  
57  
58  
59  
60

1  
2  
3 of consumption) we modified the design in our third DCE to exclude the cost attribute; this allowed  
4  
5 us to compare responses with and without a cost attribute.  
6  
7

### 8 **Content of the DCEs**

9  
10 The DCEs included 12 choice tasks per participant. Each choice task involved choosing between three  
11  
12 service specifications with different attribute-level sets. The attributes and their levels are  
13  
14 summarised in table 1 and an example of one choice task is displayed in Supplementary Figure 1.  
15  
16 Participants first selected their least preferred option and then selected their most preferred option  
17  
18 - a best-worst scaling type 3 approach [25]. The questionnaire also included questions about age,  
19  
20 gender, domestic status, education, household income and self-rated overall health. Severity of  
21  
22 chronic pain was assessed using the Chronic Pain Grade [26] and severity of chronic lung disease was  
23  
24 assessed using the Clinical COPD Questionnaire [27].  
25  
26  
27

### 28 **Participants and delivery of the DCEs**

29  
30 The DCEs and accompanying questions were delivered online through the research company  
31  
32 ResearchNow™. Participants were UK-based members of the company's online panel who were  
33  
34 aged 16 or over, who had one or more self-reported conditions associated with chronic pain (e.g.  
35  
36 osteoarthritis, fibromyalgia) or breathlessness (e.g. asthma, COPD), and whose response to  
37  
38 screening questions indicated current pain or breathlessness. For chronic pain the screening  
39  
40 required affirmative responses to two questions based on an international definition of chronic pain  
41  
42 [28]: "Are you currently troubled by pain or discomfort, either all the time or on and off?" and "Have  
43  
44 you had this pain or discomfort for more than three months?". For breathlessness we required a  
45  
46 score of 2 or more using the Royal College of Physicians 3-item questionnaire for asthma [29] which  
47  
48 indicates respiratory symptoms most days with an impact on either activity or sleep. Each DCE was  
49  
50 made available by the research company until the target number of eligible participants had  
51  
52 completed it. The DCEs were conducted between May and August 2015.  
53  
54  
55  
56  
57  
58  
59  
60



### Tests of data quality

We analysed the risk of individuals submitting low quality data in three ways, serial non-participation, dominance and response time; these are detailed in the Supplementary Methods. The primary analysis for each of the three DCEs included data from all participants, however we also conducted a sensitivity analysis in which participants who failed two or more data quality tests were excluded.

### Data analysis

#### *Value of person-centredness attributes*

We estimated the effects of higher person-centredness of each attribute on participants' choices using logistic regression with a multinomial logit (MNL) model. For each attribute, we reported the direct choice elasticity (the absolute change in the probability of a service being chosen when the attribute was switched from a "neutral" to "high" level of person-centredness). The analysis was conducted separately for each DCE.

#### *Patterns of similar value of person-centredness attributes*

We explored patterns of preference using a latent class MNL model (LC-MNL) [30] to produce a set of classes, each representing one pattern of valuation of the different attributes. We estimated six LC-MNL models including between two and eight classes and retained the model with the lowest Bayesian information criterion (BIC). We then sorted individuals into the different classes and examined associations between latent class membership and individuals' data quality and personal characteristics (e.g. gender, education level, etc.). For this analysis, we combined data from the first chronic pain DCE (including the cost attribute) and the breathlessness DCE.

#### *Sample size*

We set target sample sizes for the three DCEs of 500, 200 and 200 participants respectively. To investigate average preferences we required a minimum sample size of 82 respondents, based on

1  
2  
3 the Louviere formulae for choice proportions [31]. This was calculated using a baseline choice  
4 probability of 33%, accuracy level of 90%, confidence level of 95% and 12 tasks (observations) per  
5 respondent, with an attrition rate of 20% due to exclusion of individuals providing low quality data.  
6  
7 We recruited more than the minimum number in order to (i) improve sample representativeness  
8 and (ii) to obtain more statistical power to explore between-respondents variability in their choices.  
9  
10 The design of the DCE was carried out with Ngene 1.1.1 and the analysis was conducted with R 3.2.3.  
11  
12  
13  
14  
15

### 16 17 **Patient involvement**

18  
19 Representatives from two patient groups were members of the study management group (although  
20 only one was able to participate actively throughout). The development of the study was informed  
21 by prior and contemporaneous research exploring patients' views on what constituted person-  
22 centred care. We used the focus group and think-aloud stages to ensure that the content of the  
23 DCEs addressed key issues for patients in a comprehensible way. Two patient groups assisted with  
24 recruitment to the focus group and think-aloud stages.  
25  
26  
27  
28  
29  
30  
31  
32

### 33 **Ethics**

34  
35 The study was approved by the North of Scotland Research Ethics Service (reference 14/NS/0075).  
36  
37 Participants in the developmental stages all provided informed consent to take part. Consent for  
38 participants in the DCEs was managed by ResearchNow.  
39  
40  
41  
42

## 43 **RESULTS**

### 44 **Participant characteristics**

45  
46 517 individuals completed the main chronic pain DCE (DCE1); 200 individuals completed the  
47 breathlessness DCE (DCE2) and 206 completed the chronic pain (no-cost) DCE (DCE3). Their key  
48 characteristics are listed in table 2 and in Supplementary Table S1. Across the three DCEs, between  
49 10 and 20% of participants had experience of self-management support through a professional  
50 programme (e.g. pain management or pulmonary rehabilitation) or a peer support group.  
51  
52  
53  
54  
55  
56  
57  
58  
59  
60

### DCE data quality

Results for the individual tests for risk of low data quality are shown in Table 3. Overall data quality was good: 714 participants failed no tests (77.4%), 160 failed one (17.3%), 37 failed two (4.0%) and 12 (1.3%) failed all three. There was no difference in data quality between studies (chi-square = 9.34,  $p = 0.15$ ). The most common indicator of potentially low data quality was (short) response time.

### Value of person-centredness attributes

In each DCE, there was a clear and consistent difference between attributes in their estimated values. Table 4 shows the results for each of the DCEs: the attributes for which a higher level of person-centredness was most valued were situation (taking account of a person's current situation) and living well (working with them on what they wanted to get from life). More personally relevant information (contrasted with the same information for everyone) was valued less than these and a friendly and personal communicative style (contrasted with a neutral professional style) was valued least. Overall, higher person-centredness of the situation and living well attributes were valued four times more than higher person-centredness of communicative style. The similarity of findings between the two DCEs with a cost attribute in different conditions suggests the findings are not condition-specific, and the similarity between these two and the second pain DCE suggests that asking people about paying for services did not substantially affect preferences. The sensitivity analysis reported in Supplementary Table S2 shows that excluding those participants who failed at least two of the data quality tests had minimal effects on the results.

### Patterns of similar value of person-centredness attributes

The latent class analysis included 717 participants. The optimal model had 4 classes. The results are shown in table 5; the upper part shows the regression coefficients for the five attributes of each class, and the lower part the association of each class with demographic, economic and data quality variables. Based on the features of individuals allocated probabilistically to the four classes we characterised them as follows: Class 1 - "Situation / living well dominant": this was the largest group

1  
2  
3 (N=286, 39.9%) and had a similar pattern of coefficients to the aggregate study population. Class 2 -  
4  
5 “Information dominant”: this group (N=137, 19.1%) valued personalised information more highly  
6  
7 than other characteristics. Class 3 - “Cost minimisers”: this group (N=126, 17.6%) showed the  
8  
9 strongest aversion to cost with weak preferences for person-centredness of the attributes. More  
10  
11 than a third of this group were fast responders to items suggesting that rather than weighing up  
12  
13 choices, they made choices heuristically, driven by cost; members of this group were more likely  
14  
15 than the other groups to have a low income (<£15,600 pa). Although the coefficients for the person-  
16  
17 centredness attributes were smaller in this class compared to classes 1 and 2, they were still  
18  
19 significantly positive and followed a similar pattern to the overall sample results. Class 4 -  
20  
21 “Inconsistent data”: this group (N=168, 23.4%) showed no strong preference for person-centredness  
22  
23 in the attributes and had a weakly positive coefficient for cost which was unexpected as it implies a  
24  
25 willingness to pay more for less valued attributes. Members of this group were much more likely to  
26  
27 fail tests of data quality than those in other groups, suggesting that these results may represent  
28  
29 failure to comprehend tasks (the dominance test) or quickly “clicking through” answers without  
30  
31 considering them (the response time test).  
32  
33  
34  
35

## 36 **DISCUSSION**

37  
38 Patients valued two aspects of person-centredness more highly than others. These were attention to  
39  
40 their personal situation and orientation to what matters to them for living well. A substantial  
41  
42 minority valued personal relevance of information provision most highly. A more friendly and  
43  
44 personal communicative style was consistently valued least.  
45  
46

47  
48 This is the first study, to our knowledge, to use discrete choice experiments in health services  
49  
50 research to examine such highly personal attributes of health care delivery. DCEs, which are widely  
51  
52 used in economics, represent the most appropriate method to answer our research question.  
53  
54 Neither simpler questionnaire surveys nor qualitative research, despite its invaluable depth and  
55  
56 theoretical rigour, can quantify values for preferences. Observational studies of practice would be  
57  
58  
59  
60

1  
2  
3 vulnerable to multiple confounders and outcomes may be only weakly connected to processes [32].  
4  
5 The attributes were developed from prior theoretical and empirical work and refined and tested  
6  
7 through a series of stages following best practices for DCE development. By using an online panel we  
8  
9 obtained large samples: in the case of the chronic pain DCEs, participants had similar characteristics  
10  
11 to an earlier population cohort study [33]. However, we do not have information on non-responders;  
12  
13 this is a limitation of the study, and future studies using online panels should ensure they collect this  
14  
15 information. We conducted three separate DCEs with overlapping designs to establish  
16  
17 generalisability beyond a single condition and to ensure that the findings were not an artefact of  
18  
19 including a cost attribute. The large sample size and use of best-worst scaling allowed us to conduct  
20  
21 latent class analysis and define four categories, with two in particular demonstrating contrasting but  
22  
23 highly plausible preference types.  
24  
25  
26

27  
28 Although robustly derived and tested, the four attributes, even at the higher levels of person-  
29  
30 centredness, do not add up to a complete account of person-centred care [1-4, 6]. It is possible that  
31  
32 the wording of attribute descriptions may have biased the results by creating a larger “gap” between  
33  
34 the neutral and higher levels of person-centredness for some attributes than others. We attempted  
35  
36 to minimise this by careful testing of the wording in the development stages and by only offering  
37  
38 choices between neutral and higher levels so as to avoid negative values for particularly poor forms  
39  
40 of practice (values for avoiding loss are typically weighted differently from values for potential gains  
41  
42 [34]). We acknowledged the possibility that the data would contain systematic error introduced by  
43  
44 the challenge of completing the DCE. Rather than simply eliminate data of low quality (and  
45  
46 potentially introduce bias due to the choice of quality criteria), we chose first to include all data in  
47  
48 the primary analysis, secondly to conduct a sensitivity analysis in which data with high risk of low  
49  
50 quality were excluded, and thirdly to conduct the latent class analysis which identified a group of  
51  
52 patients with inconsistent and weak preferences which included many of the individuals who met  
53  
54 criteria for low data quality. While our findings make it clear that some aspects of person-centred  
55  
56 care do matter more than others, they act as a starting point for further enquiry including where  
57  
58  
59  
60

1  
2  
3 sufficiency thresholds lie (as described above, we compared enhanced attributes against neutral, not  
4  
5 negative ones); whether particular combinations of features are important; and whether  
6  
7 preferences change over the course of illness or in different healthcare contexts. These may require  
8  
9 different study designs and interpretive approaches.  
10

11  
12  
13  
14  
15 Making support for self-management more person-centred involves working on a complex cluster of  
16  
17 attitudes and practices. This study shows that people place a high value on support that pays  
18  
19 attention to their particular situation and on the orientation of support to what matters to them for  
20  
21 living well with their condition. We also found that people vary in the value they place on different  
22  
23 aspects of person-centredness and for a substantial minority the provision of personally relevant  
24  
25 information was the most valued attribute. One striking finding was that the least valued aspect of  
26  
27 person-centredness was that of adopting a “friendly and personal” communicative tone compared  
28  
29 to a more neutral professional one. This is important, given the current/conventional emphasis on  
30  
31 communication skills training for professionals, which has only infrequently been challenged [10,  
32  
33 35]. Our findings lend support to the view that person-centred communication needs to be  
34  
35  
36 underpinned by a broad sense of purpose that orients its content to enable the person to act in their  
37  
38 situation and towards what matters to them in life. Without that kind of purpose, attention to the  
39  
40 style of communication is unlikely to achieve the responsiveness or scope for patient engagement  
41  
42 that is sought. While our study was limited to support for self-management, the findings are likely to  
43  
44 be more widely generalisable; recent work in acute settings has shown that patients rate  
45  
46 communication which focuses on purpose, even when it has little or no emotional engagement, as  
47  
48 excellent [11].  
49  
50  
51

52  
53 In the introduction we described person-centred care as a complex concept with multiple aspects.  
54  
55 Our findings of heterogeneity in the valuation of four of these aspects (our attributes) make it clear  
56  
57 that individuals vary in which features of person-centred care matter to them most. One size does  
58  
59  
60

1  
2  
3 not fit all and providers need to be conscious of this. These differences were not associated with  
4  
5 broad social or demographic features. An emphasis on “treating as a person” – recognising and  
6  
7 cultivating an individual’s “person-al” capabilities [2] - leads to some challenging issues. It is not clear  
8  
9 how this can be achieved, and it is quite possible that individuals and their healthcare providers have  
10  
11 conflicting priorities and values. Despite these challenges, the values which patients place on these  
12  
13 attributes emphasises the importance for healthcare of providing person -centred (or “person-  
14  
15 supportive”) [2] care.  
16  
17

## 18 19 **CONCLUSION**

20 The aspects of person-centred support for self-management that people with long-term conditions  
21  
22 most value are attention to their personal situation and an orientation to what matters to them in  
23  
24 life. Investment in training to improve professionals’ skills must address the substance of clinical  
25  
26 communication – working responsively with individuals on what matters to them – as well as its  
27  
28 style.  
29  
30  
31  
32  
33  
34  
35  
36  
37  
38  
39  
40  
41  
42  
43  
44  
45  
46  
47  
48  
49  
50  
51  
52  
53  
54  
55  
56  
57  
58  
59  
60

### *Funding & Sponsorship*

The study was funded by the Health Foundation (reference THF 7264) and sponsored by the University of Aberdeen. Neither funder nor sponsor had any involvement in the conduct or reporting of the study.

### *Acknowledgements*

We wish to thank the members of Aberdeen & District Fibromyalgia support group and Grampian Pain Support for encouraging participation in the study and particularly to two of their members who took active roles as members of the study management committee.

### *Conflict of Interest*

All authors have completed the ICMJE uniform disclosure form at [www.icmje.org/coi\\_disclosure.pdf](http://www.icmje.org/coi_disclosure.pdf) and declare: no support from any organisation for the submitted work; no financial relationships with any organisations that might have an interest in the submitted work in the previous three years; no other relationships or activities that could appear to have influenced the submitted work.

### *Contributorship*

The study was conceived by CB, MR, AE and VE. All authors were involved in the planning, design, conduct and reporting of the study. TP conducted the focus groups and think-aloud studies and carried out the initial analysis of these. CB and VE led the wording of attributes and NK conducted the analysis of DCE results. All authors contributed to the writing and revision of the manuscript. CB is guarantor for the study.

### Data sharing statement

We will review any application to share the data on a case by case basis.



1  
2  
3  
4  
5  
6 Transparency

7  
8  
9 The lead author (CB) affirms that the manuscript is an honest, accurate, and transparent account of  
10 the study being reported; that no important aspects of the study have been omitted; and that any  
11 discrepancies from the study as planned have been explained.  
12  
13  
14

15  
16  
17  
18  
19  
20 Copyright

21  
22  
23 The Corresponding Author has the right to grant on behalf of all authors and does grant on behalf of  
24 all authors, a worldwide licence to the Publishers and its licensees in perpetuity, in all forms, formats  
25 and media (whether known now or created in the future), to i) publish, reproduce, distribute, display  
26 and store the Contribution, ii) translate the Contribution into other languages, create adaptations,  
27 reprints, include within collections and create summaries, extracts and/or, abstracts of the  
28 Contribution, iii) create any other derivative work(s) based on the Contribution, iv) to exploit all  
29 subsidiary rights in the Contribution, v) the inclusion of electronic links from the Contribution to  
30 third party material where-ever it may be located; and, vi) licence any third party to do any or all of  
31 the above.  
32  
33  
34  
35  
36  
37  
38  
39  
40  
41  
42  
43  
44  
45  
46  
47  
48  
49  
50  
51  
52  
53  
54  
55  
56  
57  
58  
59  
60

## References:

- 1 Epstein RM, Fiscella K, Lesser CS, et al. Why The Nation Needs A Policy Push On Patient-Centered Health Care. *Health Affairs* 2010;29:1489-95
- 2 Entwistle VA, Watt IS. Treating patients as persons: a capabilities approach to support delivery of person-centered care. *Am J Bioeth* 2013;13:29-39
- 3 Berwick DM. What 'patient-centered' should mean: confessions of an extremist. *Health Aff (Millwood)* 2009;28:w555-65
- 4 Institute of Medicine. Institute of Medicine. Crossing the Quality Chasm: A New Health System for the 21st Century. Washington, D.C.: National Academy Press, 2001
- 5 Ekman I, Swedberg K, Taft C, et al. Person-centered care--ready for prime time. *Eur J Cardiovasc Nurs* 2011;10:248-51
- 6 Lepage AF, Gzil M, Cammeli C, et al. Person-centredness: conceptual and historical perspectives. *Disabil Rehab* 2007; 29:1555-1565
- 7 McCormack B, McCance TV. Development of a framework for person-centred nursing. *J Adv Nurs* 2006; 56: 472-479
- 8 Entwistle V, Firnigl D, Ryan M, et al. Which experiences of health care delivery matter to service users and why? A critical interpretive synthesis and conceptual map. *J Health Serv Res Policy* 2012;17:70-8
- 9 Ryan M, Kinghorn P, Entwistle VA, et al. Valuing patients' experiences of healthcare processes: towards broader applications of existing methods. *Soc Sci Med* 2014;106:194-203
- 10 Wright EB, Holcombe C, Salmon P. Doctors' communication of trust, care, and respect in breast cancer: qualitative study. *BMJ* 2004;328:864
- 11 Young B, Hill J, Gravenhorst K, et al. Is communication guidance mistaken? Qualitative study of parent-oncologist communication in childhood cancer. *Br J Cancer* 2013;109:836-43
- 12 Lorig KR, Holman H. Self-management education: history, definition, outcomes, and mechanisms. *Ann Behav Med* 2003;26:1-7.
- 13 Townsend A, Wyke S, Hunt K. Self-managing and managing self: practical and moral dilemmas in accounts of living with chronic illness. *Chronic Illness* 2006;2:185-94.
- 14 Kendall E, Rogers A. Extinguishing the social?: state sponsored self-care policy and the Chronic Disease Self-management Programme. *Disability & Society* 2007;22:129-43.
- 15 Entwistle VA, Cribb A. Enabling people to live well. London, The Health Foundation 2013.
- 16 Taylor S, Pinnock H, Epiphanou E, et al. A rapid synthesis of the evidence on interventions supporting self-management for people with long-term conditions: PRISMS - Practical systematic Review of Self-Management Support for long-term conditions. *Health Serv Deliv Res* 2014;2

1  
2  
3 17 Morgan HM, Entwistle VA, Cribb A, et al. We need to talk about purpose: a critical interpretive  
4 synthesis of health and social care professionals' approaches to self-management support for people  
5 with long-term conditions. *Health Expect* 2016  
6

7 18 Dowrick C, Kokanovic R, Hegarty K, et al. Resilience and depression: perspectives from primary  
8 care. *Health (London)* 2008;12:439-52  
9

10 19 Hinder S, Greenhalgh T. "This does my head in". Ethnographic study of self-management by  
11 people with diabetes. *BMC Health Serv Res* 2012;12:83,6963  
12

13 20 Sinding C, Miller P, Hudak P, et al. Of time and troubles: patient involvement and the production  
14 of health care disparities. *Health (London)* 2012;16:400-17  
15

16 21 Clark MD, Determann D, Petrou S, et al. Discrete choice experiments in health economics: a  
17 review of the literature. *Pharmacoeconomics* 2014;32:883-902  
18

19 22 Epstein RM, Franks P, Fiscella K, et al. Measuring patient-centered communication in patient-  
20 physician consultations: theoretical and practical issues. *Soc Sci Med* 2005;61:1516-28  
21

22 23 Ryan M, Watson V, Entwistle V. Rationalising the 'irrational': a think aloud study of discrete  
23 choice experiment responses. *Health Econ* 2009;18:321-36  
24

25 24 Ferrini S, Scarpa R. Designs with a priori information for nonmarket valuation with choice  
26 experiments: A Monte Carlo study. *J Environ Econ Manage* 2007;53:342-63  
27

28 25 Lancsar E, Louviere J, Donaldson C, et al. Best worst discrete choice experiments in health:  
29 Methods and an application. *Soc Sci Med* 2013;76:74-82.  
30

31 26 Von Korff M, Ormel J, Keefe FJ, et al. Grading the severity of chronic pain. *Pain* 1992;50:133-49.  
32

33 27 van dM, Willemse BWM, Schokker S, et al. Development, validity and responsiveness of the  
34 Clinical COPD Questionnaire. *Health and Quality of Life Outcomes* 2003;1:13- doi:10.1186/1477-  
35 7525-1-13.  
36

37 28 International Association for the Study of Pain. Classification of chronic pain. . *Pain*  
38 1986;Supplement 3 (1986) S1-S226.  
39

40 29 Pearson MG, Bucknall CE. Measuring clinical outcome in asthma: a patient focused approach.  
41 London: Royal College of Physicians 1999.  
42

43 30 Greene WH, Hensher DA. A latent class model for discrete choice analysis: contrasts with mixed  
44 logit. *Transportation Research Part B: Methodological* 2003;37:681-98  
45

46 31 Louviere JH, D.A.; Swait, J.D. . Stated choice methods: analysis and application. Cambridge:  
47 Cambridge University Press; 2000.  
48

49 32 Lilford RJ, Brown CA, Nicholl J. Use of process measures to monitor the quality of clinical practice.  
50 *BMJ* 2007;335:648-50  
51

52 33 Elliott AM. Chronic pain in the community: its prevalence, impact and natural history PhD Thesis,  
53 University of Aberdeen, 2000.  
54  
55  
56  
57  
58  
59  
60

1  
2  
3  
4  
5  
6  
7  
8  
9  
10  
11  
12  
13  
14  
15  
16  
17  
18  
19  
20  
21  
22  
23  
24  
25  
26  
27  
28  
29  
30  
31  
32  
33  
34  
35  
36  
37  
38  
39  
40  
41  
42  
43  
44  
45  
46  
47  
48  
49  
50  
51  
52  
53  
54  
55  
56  
57  
58  
59  
60

34 Kahneman D, Tversky A. Prospect theory: An analysis of decision under risk. *Econometrica: Journal of the Econometric Society* 1979:263-91.

35 Salmon P, Young B. The validity of education and guidance for clinical communication in cancer care: evidence-based practice will depend on practice-based evidence. *Patient Educ Couns* 2013;90:193-9

For peer review only

Table 1 Attributes and levels for the discrete choice experiments.

| ATTRIBUTE LABEL | ATTRIBUTE DESCRIPTION                                                                                                                                                                                                    | ATTRIBUTE LEVELS                                                                                                                  |
|-----------------|--------------------------------------------------------------------------------------------------------------------------------------------------------------------------------------------------------------------------|-----------------------------------------------------------------------------------------------------------------------------------|
| Information     | By “information” we mean information about pain <sup>1</sup> , the conditions that cause it, and the different ways there are of managing it.                                                                            | Provides everyone with the same information (NEUTRAL)<br>Provides information that is relevant to you (HIGH)                      |
| Situation       | By “current situation” we mean things like where you live, who you live with, what resources you have, what you usually do for yourself and others, and how pain <sup>1</sup> currently affects that.                    | Takes little account of your current situation (NEUTRAL)<br>Makes suggestions that fit your current situation (HIGH)              |
| Living well     | By “what you want to get from life” we mean the things that really matter to you, especially the kinds of things that you would like to achieve or to spend more time doing, and the kind of person that you want to be. | Seems to think that everyone wants to get the same from life (NEUTRAL)<br>Works with you on what you want to get from life (HIGH) |
| Communication   | By “communication” we mean the way that the support service might communicate with you                                                                                                                                   | Communicates with you in a neutral professional way (NEUTRAL)<br>Communicates with you in a friendly and personal way (HIGH)      |
| Cost            | Please assume that each support service will be provided once a week for six weeks                                                                                                                                       | Costs £5 per week<br>Costs £10 per week<br>Costs £15 per week<br>Costs £20 per week                                               |

<sup>1</sup> Or breathlessness, depending on sample

Table 2 Participant characteristics

| Discrete choice experiment      |                            | Chronic Pain (DCE1)<br>N=517 |    | Breathlessness (DCE2)<br>N=200 |     | Chronic Pain (DCE3)<br>N=206 |    |
|---------------------------------|----------------------------|------------------------------|----|--------------------------------|-----|------------------------------|----|
|                                 |                            |                              | %  |                                | %   |                              | %  |
| <b>Gender</b>                   | Male                       | 176                          | 34 | 86                             | 43  | 99                           | 48 |
|                                 | Female                     | 341                          | 66 | 114                            | 57  | 107                          | 52 |
| <b>Age</b>                      | < 40 years                 | 61                           | 12 | 42                             | 21  | 23                           | 11 |
|                                 | 40-49 years                | 92                           | 18 | 43                             | 22  | 31                           | 15 |
|                                 | 50-59 years                | 129                          | 25 | 48                             | 24  | 62                           | 30 |
|                                 | 60-69 years                | 157                          | 30 | 43                             | 22  | 79                           | 38 |
|                                 | ≥ 70 years                 | 78                           | 15 | 24                             | 12  | 16                           | 8  |
| <b>Marital status</b>           | Single                     | 86                           | 17 | 25                             | 13  | 30                           | 15 |
|                                 | Married/ legal partnership | 333                          | 64 | 137                            | 69  | 142                          | 69 |
|                                 | Separated/Widowed          | 98                           | 19 | 38                             | 19  | 34                           | 17 |
| <b>Education</b>                | No formal qualifications   | 32                           | 6  | 15                             | 8   | 12                           | 6  |
|                                 | Secondary/high school      | 243                          | 47 | 87                             | 44  | 90                           | 45 |
|                                 | University/College degree  | 220                          | 43 | 89                             | 45  | 91                           | 46 |
|                                 | Other                      | 22                           | 4  | 9                              | 4.5 | 13                           | 7  |
| <b>Household income</b>         | ≤£10,399/year              | 64                           | 12 | 21                             | 11  | 26                           | 13 |
|                                 | £10,400-20,799/year        | 140                          | 27 | 36                             | 18  | 46                           | 22 |
|                                 | £20,800-36,399/year        | 158                          | 31 | 33                             | 17  | 63                           | 31 |
|                                 | £36,400-51,999/year        | 61                           | 12 | 62                             | 31  | 30                           | 15 |
|                                 | ≥£1000/week (≥£52000)      | 40                           | 8  | 32                             | 16  | 21                           | 10 |
|                                 | Prefer not to say          | 54                           | 10 | 16                             | 8   | 20                           | 10 |
| <b>Employment</b>               | Employed/working           | 182                          | 35 | 97                             | 49  | 77                           | 37 |
|                                 | Retired                    | 198                          | 38 | 55                             | 28  | 66                           | 32 |
|                                 | Long-term sick or disabled | 70                           | 14 | 13                             | 7   | 48                           | 23 |
|                                 | Other not employed         | 67                           | 13 | 35                             | 18  | 15                           | 7  |
| <b>Self-rated health status</b> | Very good                  | 21                           | 4  | 10                             | 5   | 4                            | 2  |
|                                 | Good                       | 154                          | 30 | 62                             | 31  | 46                           | 22 |
|                                 | Fair                       | 226                          | 44 | 88                             | 44  | 90                           | 44 |
|                                 | Bad                        | 97                           | 19 | 37                             | 19  | 53                           | 26 |
|                                 | Very bad                   | 19                           | 4  | 3                              | 2   | 13                           | 6  |

Table 3 Tests for risk of low quality DCE data

| Discrete Choice Experiment                          | Chronic Pain (DCE1) |       | Breathlessness (DCE2) |       | Chronic Pain (DCE3) |       | Overall |       |
|-----------------------------------------------------|---------------------|-------|-----------------------|-------|---------------------|-------|---------|-------|
|                                                     | N=517               |       | N=200                 |       | N=206               |       | N=923   |       |
| <b>Incidence of individual low-quality criteria</b> |                     |       |                       |       |                     |       |         |       |
| Serial non-participation                            | 7                   | 1.4%  | 5                     | 2.5%  | 5                   | 2.4%  | 17      | 1.8%  |
| Dominance                                           | 56                  | 10.8% | 28                    | 14.0% | 31                  | 15.0% | 115     | 12.5% |
| Response time                                       | 74                  | 14.3% | 33                    | 16.5% | 28                  | 13.6% | 135     | 14.6% |
| <b>Cumulative tests failed per individual</b>       |                     |       |                       |       |                     |       |         |       |
| One or more test failed                             | 115                 | 22.2% | 53                    | 26.1% | 44                  | 21.4% | 209     | 22.6% |
| Two or more tests failed                            | 19                  | 3.7%  | 17                    | 8.4%  | 16                  | 7.8%  | 49      | 5.3%  |
| All three tests failed                              | 3                   | 0.6%  | 5                     | 2.5%  | 4                   | 1.9%  | 12      | 1.3%  |

**Table 4 Multinomial Logit Analysis: higher vs neutral level of person-centredness by attribute and by Discrete Choice Experiment**

| Discrete Choice Experiment      | Chronic Pain (DCE1) |                  | Breathlessness (DCE2) |                  | Chronic Pain (DCE3) |                |
|---------------------------------|---------------------|------------------|-----------------------|------------------|---------------------|----------------|
|                                 | Estimate            | 95% CI           | Estimate              | 95% CI           | Estimate            | 95% CI         |
| <b>Regression coefficient</b>   |                     |                  |                       |                  |                     |                |
| Information                     | 0.65                | (0.58 to 0.73)   | 0.60                  | (0.47 to 0.72)   | 0.93                | (0.79 to 1.07) |
| Situation                       | 0.91                | (0.82 to 0.99)   | 0.90                  | (0.76 to 1.05)   | 1.43                | (1.23 to 1.63) |
| Living well                     | 0.85                | (0.78 to 0.92)   | 0.81                  | (0.68 to 0.93)   | 1.19                | (1.04 to 1.35) |
| Communication                   | 0.21                | (0.15 to 0.26)   | 0.21                  | (0.12 to 0.30)   | 0.31                | (0.20 to 0.42) |
| Cost <sup>2</sup>               | -0.06               | (-0.07 to -0.05) | -0.06                 | (-0.07 to -0.04) | -                   | -              |
| <b>Choice Elasticity (in %)</b> |                     |                  |                       |                  |                     |                |
| Information                     | 12.3                | (11.0 to 13.6)   | 10.6                  | (8.3 to 12.9)    | 15.0                | (12.9 to 17.0) |
| Situation                       | 16.9                | (15.4 to 18.3)   | 16.1                  | (13.6 to 18.6)   | 21.9                | (19.3 to 24.5) |
| Living well                     | 15.8                | (14.5 to 17.1)   | 14.6                  | (12.5 to 16.7)   | 19.4                | (17.2 to 21.6) |
| Communication                   | 3.8                 | (2.7 to 4.8)     | 4.2                   | (2.6 to 5.8)     | 5.4                 | (3.5 to 7.2)   |
| Cost                            | -1.1                | (-1.2 to -0.9)   | -1.0                  | (-1.3 to -0.8)   |                     |                |
| <b>Model statistics</b>         |                     |                  |                       |                  |                     |                |
| Individuals                     | 517                 |                  | 200                   |                  | 206                 |                |
| Observations                    | 12408               |                  | 4800                  |                  | 4944                |                |
| Parameters                      | 5                   |                  | 5                     |                  | 4                   |                |
| Log Likelihood                  | -12004              |                  | -4739                 |                  | -4542               |                |
| BIC                             | 24054               |                  | 9520                  |                  | 9117                |                |

<sup>2</sup> Coefficient for increase by £1 in cost of service

BIC: Bayesian Information Criterion



Table 5 Coefficients for preferences and class membership for 4 groups from Latent Class Logit modelling (data pooled from patients in DCE1 and DCE2)

| Latent Class                             | Class 1 – Situation / Living Well |                       | Class 2 - Information |                       | Class 3 – Cost dominant |                         | Class 4 - inconsistent |                         |
|------------------------------------------|-----------------------------------|-----------------------|-----------------------|-----------------------|-------------------------|-------------------------|------------------------|-------------------------|
|                                          | Coefficient.                      | 95% ci                | Coefficient.          | 95% ci                | Coefficient             | 95% ci                  | Coefficient            | 95% ci                  |
| <b>Preferences<sup>1</sup></b>           |                                   |                       |                       |                       |                         |                         |                        |                         |
| Information                              | 0.80                              | (0.72 to 0.88)        | <b>1.95</b>           | <b>(1.78 to 2.13)</b> | 0.24                    | (0.14 to 0.35)          | 0.01                   | (-0.07 to 0.10)         |
| Situation                                | <b>2.08</b>                       | <b>(1.95 to 2.21)</b> | 0.98                  | (0.84 to 1.12)        | 0.31                    | (0.18 to 0.44)          | 0.18                   | (0.08 to 0.28)          |
| Living well                              | <b>1.82</b>                       | <b>(1.70 to 1.94)</b> | 0.78                  | (0.65 to 0.90)        | 0.44                    | (0.32 to 0.55)          | 0.25                   | (0.16 to 0.33)          |
| Communication                            | 0.45                              | (0.37 to 0.52)        | 0.23                  | (0.10 to 0.36)        | 0.11                    | (0.01 to 0.21)          | 0.11                   | (0.03 to 0.20)          |
| Cost                                     | -0.06                             | (-0.07 to -0.06)      | -0.05                 | (-0.06 to -0.04)      | <b>-0.25</b>            | <b>(-0.27 to -0.23)</b> | 0.02                   | (0.01 to 0.02)          |
| <b>Class membership<sup>2</sup></b>      |                                   |                       |                       |                       |                         |                         |                        |                         |
| Constant                                 | -                                 | -                     | -0.77                 | (-1.71 to 0.17)       | 1.00                    | (0.15 to 1.85)          | 0.45                   | (-0.38 to 1.27)         |
| DCE2 <sup>3</sup>                        | -                                 | -                     | -0.21                 | (-0.75 to 0.32)       | -0.02                   | (-0.53 to 0.49)         | 0.07                   | (-0.40 to 0.54)         |
| Relationship: Single <sup>4</sup>        | -                                 | -                     | -0.16                 | (-0.69 to 0.36)       | -0.37                   | (-0.89 to 0.15)         | -0.10                  | (-0.58 to 0.39)         |
| Education: University <sup>5</sup>       | -                                 | -                     | 0.20                  | (-0.29 to 0.69)       | -0.05                   | (-0.54 to 0.43)         | 0.01                   | (-0.44 to 0.46)         |
| Job status: Not working <sup>6</sup>     | -                                 | -                     | -0.18                 | (-0.97 to 0.62)       | -0.08                   | (-0.82 to 0.67)         | -0.30                  | (-1.02 to 0.41)         |
| Job status: Retired <sup>6</sup>         | -                                 | -                     | -0.15                 | (-0.72 to 0.43)       | <b>-0.59</b>            | <b>(-1.17 to -0.01)</b> | <b>-0.81</b>           | <b>(-1.36 to -0.27)</b> |
| Job status: Disabled <sup>6</sup>        | -                                 | -                     | 0.31                  | (-0.67 to 1.29)       | 0.08                    | (-0.82 to 0.99)         | -0.15                  | (-1.00 to 0.70)         |
| Perceived health: Fair <sup>7</sup>      | -                                 | -                     | -0.05                 | (-0.59 to 0.49)       | -0.44                   | (-0.96 to 0.08)         | -0.09                  | (-0.59 to 0.41)         |
| Perceived health: Poor <sup>7</sup>      | -                                 | -                     | -0.58                 | (-1.33 to 0.16)       | <b>-1.06</b>            | <b>(-1.78 to -0.34)</b> | -0.45                  | (-1.11 to 0.21)         |
| Gender: Female <sup>8</sup>              | -                                 | -                     | -0.10                 | (-0.61 to 0.42)       | <b>-0.82</b>            | <b>(-1.31 to -0.33)</b> | <b>-0.62</b>           | <b>(-1.08 to -0.16)</b> |
| Income: £15600-£31199 <sup>9</sup>       | -                                 | -                     | 0.24                  | (-0.46 to 0.95)       | -0.61                   | (-1.22 to 0.01)         | -0.10                  | (-0.70 to 0.50)         |
| Income: £31200+ <sup>9</sup>             | -                                 | -                     | 0.40                  | (-0.34 to 1.15)       | <b>-1.15</b>            | <b>(-1.88 to -0.43)</b> | -0.12                  | (-0.78 to 0.53)         |
| Income: Not prepared to say <sup>9</sup> |                                   |                       | <b>0.93</b>           | <b>(0.08 to 1.78)</b> | -0.19                   | (-1.02 to 0.64)         | -0.13                  | (-1.03 to 0.78)         |
| <b>Class share</b>                       | N                                 | %                     | N                     | %                     | N                       | %                       | N                      | %                       |
| Predicted membership                     | 286                               | 39.9%                 | 137                   | 19.1%                 | 126                     | 17.6%                   | 168                    | 23.4%                   |
| <b>Data quality<sup>1</sup></b>          |                                   |                       |                       |                       |                         |                         |                        |                         |
| Serial Non Participation (N=12)          | 0                                 | -                     | 0                     | -                     | 0                       | -                       | <b>12</b>              | <b>100%</b>             |
| Dominance (N=84)                         | 11                                | 13.1%                 | 6                     | 7.1%                  | 2                       | 2.4%                    | <b>65</b>              | <b>77.4%</b>            |
| Response time (N=107)                    | 4                                 | 3.7%                  | 9                     | 8.4%                  | <b>46</b>               | <b>43.0%</b>            | <b>48</b>              | <b>44.9%</b>            |

1  
2  
3  
4  
5  
6  
7  
8  
9  
10  
11  
12  
13  
14  
15  
16  
17  
18  
19  
20  
21  
22  
23  
24  
25  
26  
27  
28  
29  
30  
31  
32  
33  
34  
35  
36  
37  
38  
39  
40  
41  
42  
43  
44  
45  
46  
47  
48  
49

<sup>1</sup> In the Preferences and Data quality sections, only the dominant values are highlighted in **bold**; <sup>2</sup> in the Class membership section, statistically significant coefficients are highlighted in **bold**; <sup>3</sup> compared to DCE1; <sup>4</sup> Compared to married /co-habiting; <sup>5</sup> compared to no university education; <sup>6</sup> compared to working; <sup>7</sup> “bad” or “very bad” self-rated health compared to “good” or “very good”. <sup>8</sup> compared to male; <sup>9</sup> compared to <£15600 per annum

For peer review only

Figure 1: Simplified illustration of mapping of different sources to final attributes

For peer review only

1  
2  
3  
4  
5  
6  
7  
8  
9  
10  
11  
12  
13  
14  
15  
16  
17  
18  
19  
20  
21  
22  
23  
24  
25  
26  
27  
28  
29  
30  
31  
32  
33  
34  
35  
36  
37  
38  
39  
40  
41  
42  
43  
44  
45  
46  
47  
48  
49  
50  
51  
52  
53  
54  
55  
56  
57  
58  
59  
60

For peer review only

1  
2  
3  
4  
5  
6  
7  
8  
9  
10  
11  
12  
13  
14  
15  
16  
17  
18  
19  
20  
21  
22  
23  
24  
25  
26  
27  
28  
29  
30  
31  
32  
33  
34  
35  
36  
37  
38  
39  
40  
41  
42  
43  
44  
45  
46  
47  
48  
49  
50  
51  
52  
53  
54  
55  
56  
57  
58  
59  
60



Figure 1: Simplified illustration of mapping of different sources to final attributes

210x148mm (300 x 300 DPI)

Review only

# Supplementary Methods

## Tests of data quality

### Overview

We analysed the risk of individuals submitting low quality data in three ways. First we included a simple dominance test to check for irrational responses. Second, we identified participants who exhibited a systematic choice pattern, e.g. systematically selecting the 1st option as “most preferred”. Third, we analysed the response time for each choice task, allowing identification of participants whose responses to the choices were either much quicker (possibly representing “clicking through” choices rather than stopping to consider) or slower (possibly indicating either difficulty comprehending the choices or distraction by other activities).

### Dominance

In addition to the 12 choice tasks, each DCE included two additional tasks: a “warm-up” choice task and a “dominance” test. The former was used to familiarise participants with the format of the choice questions and act as a transition between the instructions and first live choice task. The dominance task was the last task faced by the participants and included three options: A) all attributes set at their “best” levels (high level of personalisation with lowest level of cost); B) all attributes set at their “worst” levels (neutral personalisation with highest level of cost); and C) an intermediate option. Participants were expected to choose rationally, thus alternative A as “most preferred” and alternative B as “least preferred”. An example choice task is shown in Web Appendix A. Dominance: A respondent was considered as failing dominance test when she/he selected an irrational, “wrong”, alternative for both best and worst choice.

### Systematic choice bias

We measured serial non participation (SNP), the systematic choice based on some criterion other than the content of the attributes in relation to choice order. A respondent was considered as a serial non participant when at least 75% of his/her choices were on the same choice position (e.g. first presented, last presented) for at least one type of decision (either Best or Worst)

### Response time

For each choice task we computed the 1st quintile (20%), the median (50%) and the 4th quintile (80%) of response time (RT). We then used a bootstrapping procedure with 1000 replications to obtain the 95% confidence interval (CI) around the {20%; 50%; 80%} measures. A response time was classified as a fast outlier when its duration was shorter than the lower bound of the 95% confidence intervals for the 1st RT quintile or classified as a slow outlier when its duration was longer than the upper bound of the 95% confidence intervals of the 4th RT quintile. A respondent was considered as an outlier when either  $\geq 50\%$  of response times to decision tasks (i.e. both best and worst decisions for each choice task) were fast outliers, or  $\geq 50\%$  of response times to decision tasks were slow outliers.

# Supplementary Results

**Table S1 Additional Self-reported characteristics of participants**

|                                   |                    | Chronic Pain |    | Breathlessness |    | Chronic Pain (no cost) |    |
|-----------------------------------|--------------------|--------------|----|----------------|----|------------------------|----|
|                                   |                    | N=517        |    | N=200          |    | N=206                  |    |
|                                   |                    |              | %  |                | %  |                        | %  |
| <b>Chronic Pain Grade</b>         | Grade 0            | 0            | 0  | -              | -  | 0                      | 0  |
|                                   | Grade I            | 80           | 16 | -              | -  | 16                     | 8  |
|                                   | Grade II           | 170          | 33 | -              | -  | 58                     | 28 |
|                                   | Grade III          | 114          | 22 | -              | -  | 52                     | 25 |
|                                   | Grade IV           | 153          | 30 | -              | -  | 80                     | 39 |
| <b>COPD Control Questionnaire</b> | Minimal (< 1)      | -            | -  | 43             | 22 | -                      | -  |
|                                   | Mild (1-1.9)       | -            | -  | 53             | 26 | -                      | -  |
|                                   | Moderate (2-2.9)   | -            | -  | 45             | 22 | -                      | -  |
|                                   | Severe (≥3)        | -            | -  | 59             | 30 | -                      | -  |
| <b>Years of chronic pain</b>      | Less than 1 year   | 58           | 11 | -              | -  | 26                     | 13 |
|                                   | 1- 5 years         | 213          | 41 | -              | -  | 46                     | 22 |
|                                   | 6-10 years         | 107          | 21 | -              | -  | 63                     | 31 |
|                                   | More than 10 years | 139          | 27 | -              | -  | 30                     | 15 |



**Table S3: Regression coefficients, with 95% confidence intervals, for higher vs neutral level of personalisation of attributes from multinomial logit models, for each DCE, after exclusion of participants who failed two or more data quality tests.**

| Attribute                     | Chronic Pain |                | Breathlessness |                | Chronic Pain (no cost) |              |
|-------------------------------|--------------|----------------|----------------|----------------|------------------------|--------------|
|                               | Estimate     | 95% CI         | Estimate       | 95% CI         | Estimate               | 95% CI       |
| <b>Regression coefficient</b> |              |                |                |                |                        |              |
| Information                   | 0.65         | 0.61 to 0.69   | 0.59           | 0.52 to 0.66   | 0.87                   | 0.80 to 0.95 |
| Situation                     | 0.91         | 0.86 to 0.96   | 0.88           | 0.80 to 0.96   | 1.33                   | 1.24 to 1.42 |
| Living well                   | 0.86         | 0.81 to 0.90   | 0.79           | 0.72 to 0.87   | 1.16                   | 1.08 to 1.24 |
| Communication                 | 0.21         | 0.17 to 0.26   | 0.21           | 0.14 to 0.27   | 0.32                   | 0.25 to 0.38 |
| Cost <sup>1</sup>             | -0.06        | -0.06 to -0.06 | -0.06          | -0.06 to -0.05 | -                      | -            |
| <b>Model statistics</b>       |              |                |                |                |                        |              |
| Individuals                   | 498          |                | 186            |                | 190                    |              |
| Observations                  | 11952        |                | 4464           |                | 4560                   |              |
| Parameters                    | 5            |                | 5              |                | 4                      |              |
| Log Likelihood                | -11428       |                | -4330          |                | -4039                  |              |

<sup>1</sup> Coefficient for increase by £1 in cost of service  
BIC: Bayesian Information Criterion

1  
2  
3  
4  
5  
6  
7  
8  
9  
10  
11  
12  
13  
14  
15  
16  
17  
18  
19  
20  
21  
22  
23  
24  
25  
26  
27  
28  
29  
30  
31  
32  
33  
34  
35  
36  
37  
38  
39  
40  
41  
42  
43  
44  
45  
46  
47  
48  
49  
50  
51  
52  
53  
54  
55  
56  
57  
58  
59  
60

QUESTION 5

What kind of support service would you like to use? Each support service would be provided once a week for six weeks. Which would you like the least and which would you like the most?

Service A

- Provides information that is relevant to you
- Makes suggestions that fit your current situation
- Helps you focus on what you want to get from life
- Communicates with you in a neutral professional way
- Costs £10 per week

Service B

- Provides information that is relevant to you
- Takes little account of your current situation
- Helps you focus on what you want to get from life
- Communicates with you in a friendly and personal way
- Costs £5 per week

Service C

- Provides everyone with the same information
- Takes little account of your current situation
- Seems to think that everyone wants to get the same from life
- Communicates with you in a neutral professional way
- Costs £20 per week

1. Which service would you like the **least**?

Service A

Service B

Service C

2. Which service would you like the **most**?

Service A

Service B

Service C

297x420mm (300 x 300 DPI)
