# Supplementary material for: The value of different aspects of person-centred care: a series of discrete choice experiments in people with long-term conditions
Source: PubMed Central journal article supplement — BMJ Open. 2017 Apr 26;7(4):e015689. doi: 10.1136/bmjopen-2016-015689 (PMC5719647; doi:10.1136/bmjopen-2016-015689), 2017-04-26
Supplement: bmjopen-2016-015689supp002.pdf [file bmjopen-2016-015689supp002.pdf]

# Supplementary Results

**Table S1 Additional Self-reported characteristics of participants**

|                                   |                    | Chronic Pain |    | Breathlessness |    | Chronic Pain (no cost) |    |
|-----------------------------------|--------------------|--------------|----|----------------|----|------------------------|----|
|                                   |                    | N=517        |    | N=200          |    | N=206                  |    |
|                                   |                    |              | %  |                | %  |                        | %  |
| <b>Chronic Pain Grade</b>         | Grade 0            | 0            | 0  | -              | -  | 0                      | 0  |
|                                   | Grade I            | 80           | 16 | -              | -  | 16                     | 8  |
|                                   | Grade II           | 170          | 33 | -              | -  | 58                     | 28 |
|                                   | Grade III          | 114          | 22 | -              | -  | 52                     | 25 |
|                                   | Grade IV           | 153          | 30 | -              | -  | 80                     | 39 |
| <b>COPD Control Questionnaire</b> | Minimal (< 1)      | -            | -  | 43             | 22 | -                      | -  |
|                                   | Mild (1-1.9)       | -            | -  | 53             | 26 | -                      | -  |
|                                   | Moderate (2-2.9)   | -            | -  | 45             | 22 | -                      | -  |
|                                   | Severe (≥3)        | -            | -  | 59             | 30 | -                      | -  |
| <b>Years of chronic pain</b>      | Less than 1 year   | 58           | 11 | -              | -  | 26                     | 13 |
|                                   | 1- 5 years         | 213          | 41 | -              | -  | 46                     | 22 |
|                                   | 6-10 years         | 107          | 21 | -              | -  | 63                     | 31 |
|                                   | More than 10 years | 139          | 27 | -              | -  | 30                     | 15 |

**Table S3: Regression coefficients, with 95% confidence intervals, for higher vs neutral level of personalisation of attributes from multinomial logit models, for each DCE, after exclusion of participants who failed two or more data quality tests.**

| Attribute                     | Chronic Pain |                | Breathlessness |                | Chronic Pain (no cost) |              |
|-------------------------------|--------------|----------------|----------------|----------------|------------------------|--------------|
|                               | Estimate     | 95% CI         | Estimate       | 95% CI         | Estimate               | 95% CI       |
| <b>Regression coefficient</b> |              |                |                |                |                        |              |
| Information                   | 0.65         | 0.61 to 0.69   | 0.59           | 0.52 to 0.66   | 0.87                   | 0.80 to 0.95 |
| Situation                     | 0.91         | 0.86 to 0.96   | 0.88           | 0.80 to 0.96   | 1.33                   | 1.24 to 1.42 |
| Living well                   | 0.86         | 0.81 to 0.90   | 0.79           | 0.72 to 0.87   | 1.16                   | 1.08 to 1.24 |
| Communication                 | 0.21         | 0.17 to 0.26   | 0.21           | 0.14 to 0.27   | 0.32                   | 0.25 to 0.38 |
| Cost <sup>1</sup>             | -0.06        | -0.06 to -0.06 | -0.06          | -0.06 to -0.05 | -                      | -            |
| <b>Model statistics</b>       |              |                |                |                |                        |              |
| Individuals                   | 498          |                | 186            |                | 190                    |              |
| Observations                  | 11952        |                | 4464           |                | 4560                   |              |
| Parameters                    | 5            |                | 5              |                | 4                      |              |
| Log Likelihood                | -11428       |                | -4330          |                | -4039                  |              |

<sup>1</sup> Coefficient for increase by £1 in cost of service  
BIC: Bayesian Information Criterion
